# Supplementary material for: Some Like it Hot: The Ecology, Ecosystem Benefits and Restoration Potential of Oyster Reefs in Tropical Waters
Source: Frontiers journal article supplement (doi:10.3389/fmars.2022.873768), 2022-06-23
Supplement: Data_Sheet_1.docx [file Data_Sheet_1.docx]

**Supplementary Methods**

During this search *Magallana cuttackensis* and *Magallana gryphoides* were identified as reef-building, however both species are “taxon inquirendum” in the World Register of Marine Species (WoRMS). Aslam et al. (2020) states that *M. gryphoides* is the giant oyster *M. cuttackensis* while Guo et al. (2018) concluded that *M. cuttackensis* is likely *Magallana belcheri*. *M. belcheri* can up to 450mm (Willan et al., 2021) which matches the “giant oyster” description of *M. cuttackensis*. Genetic sequencing of *M. cuttackensis* and *M. gryphoides* both match *M. belcheri* (Li et al., 2017), therefore *M. cuttackensis* and *M. gryphoides* have been counted as the one species *M. belcheri*. Similarly, *Magallana iredalei*, *Magallana lugubris* and *Magallana madrasensis* have been counted as the one species *Magallana bilineata* as this is the accepted species name in WorMS. Invasive species in introduced areas were excluded as they are unlikely to be used for oyster reef-restoration (Harwell et al., 2010).

Reference to *Pinctada* and *Pteria* beds was found in literature, however the term “beds” was used in the context of commercial harvesting grounds (Taylor et al., 1997; Arnaud-Haond et al., 2005; Ostroff, 2020) and most species within these genera settle as individuals and do not form biogenic habitats. For example, *Pinctada maxima* restoration in Vietnam included the release of spat onto a coral reef where they settled as individuals and not gregariously to form biogenic habitats (Tuan and Tuyen, 2021). Most *Pinctada* species and all *Pteria* species were therefore not counted as reef-building as they did not fit our definition of “settling gregariously to form biogenic habitats”. Although some *Pinna* species form biogenic habitats, they settle in soft sediment and do not settle gregariously (Alleway et al., 2015; Rabaoui et al., 2015), thus no *Pinna* species were identified as reef-building by our definition.

*Pinctada albina sugillata* builds reefs in subtropical/temperate South Australia (Alleway et al., 2015), however literature refers to this species as having tropical distributions (O’Connor, 2002; Sanpanich, 2011). We found no evidence of existing reefs in tropical areas. It is unclear whether the South Australian populations of *P. albina sugillata* are an introduced tropical species (and therefore disqualified from our diversity count) or an entirely different species. Further research confirming the identity of this species and its native distribution is needed before *P. albina sugillata* can be confirmed as a tropical, temperate or eurythermal reef-building species. *Pinctada imbricata* has been reported from multiple regions and taxonomic ambiguities for the species remain (Bean et al., 2020) however the species name is accepted in WoRMS and is native to the Caribbean region and has been included in our diversity count (Lodeiros et al., 2002; Romero, 2003).

*Saccostrea glomerata* has been reported in tropical locations (do Amaral and Simone, 2016), however, the northern most limit of its distribution in Queensland, Australia is subtropical (McDougall et al., 2020). *S. glomerata* has both subtropical and temperate distributions in Australia where remnant reefs still exist (Gillies et al., 2020) and it has been described by Lam and Morton (2006) as a “temperate species from the southern hemisphere”. It is therefore likely that *S. glomerata* has been misidentified in the tropics (Angell, 1986) and it has been counted as a temperate species. S*accostrea cucullata* and *Saccostrea scyphophilla* were identified as reef-building, however there is not enough evidence in literature to confirm whether *Saccostrea malabonensis* (Li et al., 2017) and *Saccostrea mordoides* (Cui et al., 2021), previously known respectively as the aforementioned species, are also reef-building, so they have not been counted as reef-building. Lineages of *S. cucullata* and *S. schyphophilla* are denoted with an asterisks* in **Figure 1** to indicate that there are multiple lineages represented by these names, however they have only been counted once in our diversity estimate (Lam and Morton, 2006; Guo et al., 2018; McDougall et al., 2020).

**References**

Alleway, H.K., Crawford, C., Creighton, C., Diggles, B., Ford, J., Gillies, C.L., Hamer, P., Lebrault, E., and Le Port, A. (2015). "Shellfish reef habitats: a synopsis to underpin the repair and conservation of Australia’s environmentally, socially and economically important bays and estuaries", in: *Report to the National Environmental Science Programme, Marine Biodiversity Hub.* (eds.) C.L. Gillies, C. Creighton & I.M. Mcleod. Centre for Tropical Water and Aquatic Ecosystem Research (TropWATER) Publication, James Cook University, Townsville).

Angell, C.L. (1986). The biology and culture of tropical oysters. *ICLARM Studies and Reviews* 13

Arnaud-Haond, S., Blanc, F., Bonhomme, F., and Monteforte, M. (2005). Recent foundation of Mexican populations of pearl oysters (Pteria sterna) revealed by lack of genetic variation on two mitochondrial genes. *Journal of the Marine Biological Association of the United Kingdom* 85**,** 363-366

Aslam, S., Dekker, H., Siddiqui, G., Mustaquim, J., and Kazmi, S.J.H. (2020). Biodiversity on intertidal oyster reefs in the Hab River mouth: 35 new records from Pakistan. *Regional Studies in Marine Science* 39 DOI: 10.1016/j.rsma.2020.101415.

Bean, T.P., Khatir, Z., Lyons, B.P., Van Aerle, R., Minardi, D., Bignell, J.P., Smyth, D., Giraldes, B.W., and Leitão, A. (2020). De novo transcriptome assembly of the Qatari pearl oyster Pinctada imbricata radiata. *Marine Genomics* 51**,** 100734

Cui, Z., Hu, L., Li, C., Zhang, Z., Guo, X., and Wang, H. (2021). Identification of Saccostrea mordax and a New Species Saccostrea mordoides sp. nov. (Bivalvia: Ostreidae) from China. *Journal of Shellfish Research* 40 DOI: 10.2983/035.040.0107.

Do Amaral, V.S., and Simone, L.R.L. (2016). Comparative anatomy of five species of Saccostrea Dollfus and Dautzenberg, 1920 (Bivalvia: Ostreidae) from the Pacific Ocean. *The Nautilus* 130**,** 53-71

Gillies, C.L., Castine, S.A., Alleway, H.K., Crawford, C., Fitzsimons, J.A., Hancock, B., Koch, P., Mcafee, D., Mcleod, I.M., and Zu Ermgassen, P.S.E. (2020). Conservation status of the oyster reef ecosystem of southern and eastern Australia. *Global Ecology and Conservation* 22 DOI: 10.1016/j.gecco.2020.e00988.

Guo, X., Li, C., Wang, H., and Xu, Z. (2018). Diversity and Evolution of Living Oysters. *Journal of Shellfish Research* 37**,** 755-771 DOI: 10.2983/035.037.0407.

Harwell, H.D., Kingsley-Smith, P.R., Kellogg, M.L., Allen, S.M., Allen, S.K.J., Meritt, D.W., Paynter, K.T.J., and Luckenbach, M.W. (2010). A comparison of Crassostrea virginica and C. ariakensis in Chesapeake Bay: does oyster species affect habitat function? *Journal of Shellfish Research* 29**,** 253-269

Lam, K., and Morton, B. (2006). Morphological and mitochondrial-DNA analysis of the Indo-West Pacific rock oysters (Ostreidae: Saccostrea species). *Journal of Molluscan Studies* 72**,** 235-245 DOI: 10.1093/mollus/eyl002.

Li, C., Haws, M., Wang, H., and Guo, X. (2017). Taxonomic classification of three oyster (Ostreidae) species from Myanmar. *Journal of Shellfish Research* 36**,** 365-371

Lodeiros, C., Pico, D., Prieto, A., Narváez, N., and Guerra, A. (2002). Growth and survival of the pearl oyster Pinctada imbricata (Röding 1758) in supended and bottom. *Aquaculture International* 10**,** 327-338

Mcdougall, C., Nenadic, N., and Healy, J. (2020). "Guide to Queensland’s intertidal oysters", (ed.) G. University. (Brisbane, QLD, Australia: Griffith University).

O’connor, W.A. (2002). Latitudinal variation in reproductive behavior in the pearl oyster, Pinctada albina sugillata. *Aquaculture* 209**,** 333-345

Ostroff, S. (2020). "Can the Oyster Speak? Pearling Empires and the Marine Environments of South India and Sri Lanka, c. 1600–1900," in *Animal Trade Histories in the Indian Ocean World,* eds. M. Chaiklin, P. Gooding & G. Campbell. (Cham: Springer International Publishing), 65-98.

Rabaoui, L., Belgacem, W., Ismail, D.B., Mansour, L., and Tlig-Zouari, S. (2015). Engineering effect of Pinna nobilis shells on benthic communities. *Oceanologia* 57**,** 271-279

Romero, A. (2003). Death and taxes: the case of the depletion of pearl oyster beds in sixteenth‐century Venezuela. *Conservation Biology* 17**,** 1013-1023

Sanpanich, K. (2011). Marine bivalves occurring on the east coast of the Gulf of Thailand. *Science Asia* 37**,** 195-204

Taylor, J.J., Southgate, P.C., and Rose, R.A. (1997). Fouling animals and their effect on the growth of silver-lip pearl oysters, Pinctada maxima (Jameson) in suspended culture. *Aquaculture* 153**,** 31-40

Tuan, V.S., and Tuyen, H.T. (2021). Restoration of the silver-lipped pearl oyster Pinctada maxima (Jameson, 1901) in Phu Quoc Marine Protected Area, Vietnam. *Phuket Marine Biological Center Research Bulletin* 78**,** 117-124

Willan, R.C., Nenadic, N., Ramage, A., and Mcdougall, C. (2021). Detection and identification of the large, exotic, crassostreine oyster Magallana bilineata (Röding, 1798) in northern Queensland, Australia. *Molluscan Research***,** 1-11 DOI: 10.1080/13235818.2020.1865515.
