# Supplementary material for: Some Like it Hot: The Ecology, Ecosystem Benefits and Restoration Potential of Oyster Reefs in Tropical Waters
Source: Frontiers journal article supplement (doi:10.3389/fmars.2022.873768), 2022-06-23
Supplement: Table_1.XLSX [file Table_1.XLSX]

## Sheet: Full oyster list
Accepted name	Alternative/previous name	Review	Review papers	Evidence of reef-building in reviews?	Type of evidence	Evidence of existing reefs in species search?	Location of existing reefs?	Reef-building source	Reef-building or gregarious?	Evidence of co-occurring oyster species in reviews/species search?	Mixed species reef sources	Species distribution in review + existing reefs?	Location found	Evidence of habitat associations in reviews?	Evidence of other habitat associations in species search?	Habitat associations sources	Additional notes
Crassostrea brasiliana	Crassostrea gasar	Yes	do Amaral and Simone 2014; Guo et al 2018	No	NA	Yes	Subtropical	Westphal and Ostrensky 2016	Reef-building	C. brasiliana + Crassostrea sp	Westphal and Ostrensky 2016	Tropical + Subtropical	Western Atlantic	Mangroves and rocks	No	do Amaral and Simone 2014
Crassostrea columbiensis		Yes	Guo et al 2018; Lodeiros et al 2020	Yes	"Attaches to mangrove roots and each other"	No	NA	Lodeiros et al 2020	Gregarious	No	NA	Tropical + Subtropical	Eastern Pacific	Mangroves	No	Lodeiros et al 2020
Crassostrea corteziensis		Yes	Guo et al 2018; Lodeiros et al 2020	Yes	"High diversity of species and invertebrate epibionts that use oyster shells as habitats confers the character of bioengineers"	No	NA	Lodeiros et al 2020	Reef-building	C. corteziensis + S. palmula	Lodeiros et al 2020	Tropical + Subtropical	Eastern Pacific	Rocks	No	Lodeiros et al 2020
Crassostrea rhizophorae		Yes	do Amaral and Simone 2014; Guo et al 2018; zuErmgassen et al 2020	Yes	Species of interest for reef restoration	No	NA	zuErmgassen et al 2020	Reef-building	No	NA	Tropical	Caribbean	Mangroves (exclusively)	No	do Amaral and Simone 2014; zuErmgassen et al 2020
Crassostrea tulipa	Crassostrea gasar	Yes	Guo et al 2018	No	NA	Yes	Tropical	Crow and Carney 2012	Reef-building	No	NA	Tropical	Eastern Atlantic	No	Mangroves and rocks	Crow and Carney 2012
Crassostrea virginica	Crassostrea virginica	Yes	do Amaral and Simone 2014; Guo et al 2018; Reeves et al 2020; Hernandez et al 2018	Yes	Existing remnant and restored reefs	Yes	Subtropical + Temperate	Hernandez et al 2018	Reef-building	No	NA	Tropical + Subtropical + Temperate	Western Atlantic	Rocks	Mangroves	Aquino-Thomas and Proffitt 2014; Hernandez et al 2018
Isognomon alatus		Yes	Benthotage et al 2020	No	NA	Yes	Subtropical	de la Cruz-Francisco et al 2019	Reef-building	No	NA	Tropical + Subtropical	Caribbean, eastern Pacific and Indo-Pacific	Mangroves	No	Benthotage et al 2020
Isognomon bicolor		Yes	Benthotage et al 2020	No	NA	Yes	Subtropical	Henriques and Casarini 2009	Reef-building	No	NA	Tropical + Subtropical	Western Atlantic and Caribbean	Mangroves and coral reefs	No	Benthotage et al 2020
Isognomon ephippium		Yes	Alleway et al 2015; Benthotage et al 2020	Yes	Existing reefs and species of interest for restoration	Yes	Tropical and subtropical	Alleway et al 2015; Benthotage et al 2020	Reef-building	No	NA	Tropical + Subtropical	Indo-Pacific	Mangroves and coral reefs	No	Benthotage et al 2020
Isognomon isognomum	Isognomon attenuata	Yes	Benthotage et al 2020	Yes	Existing reefs	Yes	Tropical + Temperate	Noseworthy et al 2016	Reef-building	Isognomon isognomum + Malleus regula	Yonge 1968; Noseworthy et al 2016	Tropical + Subtropical + Temperate	Indo-Pacific and western Pacific	Coral reefs	Rocks	Noseworthy et al 2016; Benthotage et al 2020	Malleus genus (hammer oysters) not included in review
Isognomon nucleus	Isognomon acutirostris	Yes	Benthotage et al 2020	No	NA	Yes	Tropical	Samakraman et al 2010	Reef-building	Isognomon nucleus + S. cucullata	Samakraman et al 2010	Tropical	Indo-Pacific	No	Rocks	Samakraman et al 2010
Magallana angulata	Crassostrea angulata	Yes	Guo et al 2018; Reeves et al 2020	Yes	Species of interest for reef restoration	No	NA	Reeves et al 2020	Reef-building	No	NA	Tropical + Subtropical	Indo-Pacific, western Pacific	No	Mangroves and rocks	Wang et al 2010; Xia et al 2014
Magallana ariakensis	Crassostrea ariakensis Crassostrea rivularis	Yes	Zhou and Allen 2003; Guo et al 2018; Reeves et al 2020; zuErmgassen et al 2020	Yes	Existing reefs and species of interest for restoration	Yes	Subtropical	Zhou and Allen 2003; Wang et al 2018; Reeves et al 2020; Quan et al 2020	Reef-building	M. ariakensis + M. sikamea M. ariakensis + M. gigas + M. sikamea + O. denselamellosa	Wang et al 2020 zuErmgassen et al 2020	Tropical + Subtropical + Temperate	Indo-Pacific, western Pacific	Rocks	Mangroves	Zhou and Allen 2003; Xia et al 2014
Magallana belcheri	Crassostrea belcheri M. cuttackensis M. gryphoides	Yes	Guo et al 2018	No	NA	Yes	Tropical + Subtropical	Nagi et al 2011; Naik and Gowda 2013; Aslam et al 2020	Reef-building	M. belcheri + M. bilineata M. belcheri + M. bilineata + S. cucullata	Nagi et al 2011; Aslam et al 2020; Naik and Gowda 2013	Tropical + Subtropical	Indo-Pacific and central Indian	No	Mangroves	Nagi et al 2011; Gastineau et al 2018
Magallana bilineata	Crassostrea bilineata Crassostrea iredalei Crassostrea madrasensis Crassostrea lugubris	Yes	Guo et al 2018	No	NA	Yes	Tropical + Subtropical	Naik and Gowda 2013; Aslam et al 2020; Lau et al 2020	Reef-building	M. belcheri + M. bilineata M. belcheri + M. bilineata + S. cucullata	Nagi et al 2011; Aslam et al 2020; Naik and Gowda 2013	Tropical + Subtropical	Indo-Pacific and central Indian	No	Mangroves and rocks	Nagi et al 2011; Lam and Morton 2004; Lau et al 2020
Magallana cuttackensis	Crassosrea cuttackensis	Yes	Guo et al 2018	No	NA	Yes	Subtropical	Aslam et al 2020	Reef-building	M. bilineata + M. cuttackensis	Aslam et al 2020	Tropical + Subtropical	Indo-Pacific and central Indian	No	No	NA	This species is most likely Magallana belcheri
Magallana gigas	Crassostrea gigas	Yes	do Amaral and Simone 2014; Guo et al 2018; McAfee and Connell 2020; Reeves et al 2020; zuErmgassen et al 2020	Yes	Existing reefs	Yes	Subtropical + Temperate	McAfee and Connell 2020; Reeves et al 2020	Reef-building	M. ariakensis + M. gigas + M. sikamea + O. denselamellosa	zuErmgassen et al 2020	Tropical + Subtropical + Temperate	Indo-Pacific, western Pacific	Rocks	No	do Amaral and Simone 2014; McAfee and Connell 2020; Reeves et al 2020
Magallana gryphoides	Crassostrea gryphoides	No	NA	NA	NA	Yes	Tropical	Nagi et al 2011 Naik and Gowda 2013	Reef-building	M. gryphoides + M. bilineata M. gryphoides + M. bilineata + S. cucullata	Nagi et al 2011; Naik and Gowda 2013	Tropical	Central Indian	No	Mangroves	Nagi et al 2011	This species is most likely Magallana belcheri
Magallana hongkongensis	Crassostrea hongkongensis	Yes	Guo et al 2018	No	NA	Yes	Tropical	Lau et al 2020	Reef-building	M. hongkongensis + M. sikamea + T. zhanjiangensis	Wu et al 2013	Tropical	Indo-Pacific	No	Mangroves and rocks	Lam and Morton 2003; Lam and Moreton 2004; Xia et al 2014
Magallana sikamea	Crassostrea sikamea	Yes	Guo et al 2018; zuErmgassen et al 2020	Yes	Species of interest for reef restoration	No, but reference to reef-building	Subtropical	Wang et al 2013; Wang et al 2018	Reef-building	M. ariakensis + M. sikamea M. hongkongensis + M. sikamea + T. zhanjiangensis M. ariakensis + M. gigas + M. sikamea + O. denselamellosa	Wang et al 2020 Wu et al 2013 zuErmgassen et al 2020	Tropical + Subtropical + Temperate	Indo-Pacific, western Pacific	No	Mangroves and rocks	Wang et al 2013; Xia et al 2014
Ostrea angasi		Yes	Guo et al 2018; Gillies et al 2020; Reeves et al 2020; zuErmgassen et al 2020	Yes	Existing reefs and species of interest for restoration	Yes	Temperate	Gillies et al 2020; Reeves et al 2020; zuErmgassen et al 2020	Reef-building	No	NA	Temperate	Western South Pacific and Southern Ocean (Australia)	NA	NA	NA
Ostrea chilensis		Yes	Guo et al 2018	No	NA	Yes	Temperate	Cranfield 1979	Reef-building	No	NA	Temperate	South Pacific	NA	NA	NA
Ostrea conchaphila		Yes	Polson et al 2009; Guo et al 2018; Lodeiros et al 2020	Yes	Referred to as reef-building	No	NA	Polson et al 2009	Reef-building	No	NA	Tropical + Subtropical	Eastern Pacific	Rocks	No	Polson et al 2009
Ostrea denselamellosa		Yes	Guo et al 2018; zuErmgassen et al 2020	Yes	Species of interest for reef restoration	No	NA	zuErmgassen et al 2020	Reef-building	M. ariakensis + M. gigas + M. sikamea + O. denselamellosa	zuErmgassen et al 2020	Tropical + Subtropical + Temperate	Indo-Pacific, western Pacific	No	No	NA
Ostrea edulis		Yes	Guo et al 2018; Reeves et al 2020; zuErmgassen et al 2020	Yes	Existing reefs and species of interest for restoration	Yes	Temperate	Bennema et al 2020	Reef-building	No	NA	Temperate	Eastern north Atlantic and North Sea	NA	NA	NA
Ostrea lurida		Yes	Pritchard et al 2015; Guo et al 2018; Reeves et al 2020	Yes	Existing reefs and species of interest for restoration	Yes	Temperate	Pritchard et al 2015; Reeves et al 2020	Reef-building	No	NA	Temperate	Eastern north Pacific	NA	NA	NA
Ostrea puelchana		Yes	Guo et al 2018	No	NA	Yes	Temperate	Doldan et al 2021	Reef-building	No	NA	Temperate	Eastern south Pacific	NA	NA	NA
Pinctada albina		No	NA	NA	NA	Yes	Subtropical/ Temperate	Alleway et al 2015	Reef-building	No	NA	Subtropical/ Temperate	Southern Australia	NA	NA	NA	Confusion as to whether this is an invasive species in South Australia from the tropics, or whether it is a species yet to be described. Further genetic work is needed.
Pinctada imbricata	Pinctada imbricata radiata	No	NA	NA	NA	Yes	Tropical	Romero 2003	Reef-building	No	NA	Tropical	Western Atlantic	NA	NA	NA	This species is reported on from around the world, however is likely native to the Caribbean. Generally there are taxonomic confusions of Pinctada imbricata radiata
Pinctada margaritifera		No	NA	NA	NA	No, but pictures of gregarious clumps	NA	Sims 1993	NA	NA	NA	Tropical	Indo-Pacific	NA	Coral	Sims 1993
Pinctada radiata	Pinctada imbricata radiata	No	NA	NA	NA	Yes	Subtropical	Al-Khayat and Al-Ansi 2008	Reef-building	No	NA	Subtropical	Arabian Gulf	NA	Rocks and corals	Al-Khayat and Al-Ansi 2008
Saccostrea cucullata		Yes	do Amaral and Simone 2016; Gillies et al 2018; Guo et al 2018; Reeves et al 2020	Yes	Referred to as reef-building	Yes	Tropical	Sundaram 1988; Naik and Gowda 2013	Reef-building	Isognomon nucleus + S. cucullata M. belcheri + M. bilineata + S. cucullata	Samakraman et al 2010; Naik and Gowda 2013	Tropical + Subtropical	Indo-Pacific and central Indian	No	Mangroves and rocks	Lam and Morton 2004; Yahya et al 2020
Saccostrea echinata	Saccostrea mytiloides Saccostrea lineage B?	Yes	do Amaral and Simone 2016; Gillies et al 2018; Guo et al 2018	Yes	NA	No	NA	Gillies et al 2018	Reef-building	No	NA	Tropical + Subtropical	Indo-Pacific and western Pacific	No	Mangroves	Yahya et al 2020
Saccostrea glomerata	Saccostrea commercialis	Yes	Alleway et al 2015; Guo et al 2018; Gillies et al 2020; Reeves et al 2020	Yes	Existing reefs	Yes	Subtropical + Temperate	Gillies et al 2020	Reef-building	S. glomerata + Pinctada sp	Alleway et al 2015	Subtropical + Temperate	Western South Pacific	NA	NA	NA
Saccostrea kegaki		Yes	Guo et al 2018	No	NA	No, but reference to as a foundation species	NA	Tomatsuri and Kon 2017	Reef-building	No	NA	Tropical + Subtropical + Temperate	Indo-Pacific and western Pacific	NA	Mangroves	Yahya et al 2020
Saccostrea palmula	Saccostrea tubulifera	Yes	Guo et al 2018; Lodeiros et al 2020	No	NA	Yes	Subtropical	Cáceres-Martínez et al 2012	Reef-building	C. corteziensis + S. palmula	Lodeiros et al 2020	Tropical + Subtropical	Eastern Pacific	Mangroves and rocks	No	Lodeiros et al 2020
Saccostrea scyphophilla	Crassostrea amasa Saccostrea mordax	Yes	do Amaral and Simone 2016; Guo et al 2018	No	NA	No, but reference to reef-building	Tropical	Peck 2019	Reef-building	No	NA	Tropical	Indo-Pacific and western Pacific	Rocks and wholly marine environments	Mangroves	do Amaral and Simone 2016; Yahya et al 2020	Mangrove associations unlikely as this is a marine species
Striostrea margaritacea		Yes	Guo et al 2018	No	NA	Yes	Subtropical	Dye et al 1994	Reef-building	No	NA	Tropical + Subtropical	South eastern Atlantic	No	Rocks	Dye et al 1994
Striostrea prismatica		Yes	Guo et al 2018; Ríos-González et al 2018; Lodeiros et al 2020	Yes	Existing reefs	Yes	Tropical + Subtropical	Ríos-González et al 2018; Campos and Fournier 1989	Reef-building	No	NA	Tropical + Subtropical	Eastern Pacific	Rocks	No	Lodeiros et al 2020
Talonostrea salpinx		No	NA	NA	NA	Yes	Subtropical	Al-Kandari et al 2021	Reef-building	No	NA	Subtropical	Arabian Gulf	NA	Rocks	Al-Kandari et al 2021
Talonostrea zhanjiangensis	Crassostrea zhanjiangensis	Yes	Guo et al 2018	No	NA	No, but pictures of gregarious clumps	Tropical	Wu et al 2013	Gregarious	M. hongkongensis + M. sikamea + T. zhanjiangensis	Wu et al 2013	Tropical	Indo-Pacific	NA	Rocks	Wu et al 2013
Crassostrea aequatorialis		Yes	Lodeiros et al 2020	No	NA	No	NA	NA	NA	NA	NA	NA	NA	NA	NA	NA
Crassostrea mangle		Yes	Lodeiros et al 2020	No	NA	No	NA	NA	NA	NA	NA	NA	NA	NA	NA	NA
Crassostrea markushuberi		No	NA	NA	NA	No	NA	NA	NA	NA	NA	NA	NA	NA	NA	NA
Crassostrea praia		Yes	do Amaral and Simone 2014	No	NA	No	NA	NA	NA	NA	NA	NA	NA	NA	NA	NA
Crassostrea valentichscotti		No	NA	NA	NA	No	NA	NA	NA	NA	NA	NA	NA	NA	NA	NA
Hyotissa hyotis		Yes	Guo et al 2018	No	NA	No	NA	NA	NA	NA	NA	NA	NA	NA	NA	NA
Hyotissa inermis	Hyotissa imbricata	Yes	Guo et al 2018	No	NA	No	NA	NA	NA	NA	NA	NA	NA	NA	NA	NA
Hyotissa mcgintyi		Yes	Guo et al 2018	No	NA	No	NA	NA	NA	NA	NA	NA	NA	NA	NA	NA
Hyotissa numisma		Yes	Guo et al 2018	No	NA	No	NA	NA	NA	NA	NA	NA	NA	NA	NA	NA
Hyotissa quercinus		Yes	Guo et al 2018	No	NA	No	NA	NA	NA	NA	NA	NA	NA	NA	NA	NA
Hyotissa sinensis		Yes	Guo et al 2018	No	NA	No	NA	NA	NA	NA	NA	NA	NA	NA	NA	NA
Isognomon albisorer		No	NA	NA	NA	No	NA	NA	NA	NA	NA	NA	NA	NA	NA	NA
Isognomon australicus	Isognomon anomioides	No	NA	NA	NA	No	NA	NA	NA	NA	NA	NA	NA	NA	NA	NA
Isognomon californicus		Yes	Benthotage et al 2020	No	NA	No	NA	NA	NA	NA	NA	NA	NA	NA	NA	NA
Isognomon dunkeri	Perna dunkeri	No	NA	NA	NA	No	NA	NA	NA	NA	NA	NA	NA	NA	NA	NA
Isognomon incisum	Perna incisa	No	NA	NA	NA	No	NA	NA	NA	NA	NA	NA	NA	NA	NA	NA
Isognomon janus		No	NA	NA	NA	No	NA	NA	NA	NA	NA	NA	NA	NA	NA	NA
Isognomon legumen		No	NA	NA	NA	No	NA	NA	NA	NA	NA	NA	NA	NA	NA	NA
Isognomon perna		No	NA	NA	NA	No	NA	NA	NA	NA	NA	NA	NA	NA	NA	NA
Isognomon radiatus		No	NA	NA	NA	No	NA	NA	NA	NA	NA	NA	NA	NA	NA	NA
Isognomon recognitus		No	NA	NA	NA	No	NA	NA	NA	NA	NA	NA	NA	NA	NA	NA
Isognomon vulselloides		No	NA	NA	NA	No	NA	NA	NA	NA	NA	NA	NA	NA	NA	NA
Lopha cristagalli	Crassostrea cristagalli	Yes	Guo et al 2018	No	NA	No	NA	NA	NA	NA	NA	NA	NA	NA	NA	NA
Magallana dactylena	Crassostrea dactylena	Yes	Guo et al 2018	No	NA	No	NA	NA	NA	NA	NA	NA	NA	NA	NA	NA
Magallana dianbaiensis	Crassostrea dianbaiensis	Yes	Guo et al 2018	No	NA	No	NA	NA	NA	NA	NA	NA	NA	NA	NA	NA
Magallana nippona	Crassostrea nippona	Yes	Guo et al 2018	No	NA	No	NA	NA	NA	NA	NA	NA	NA	NA	NA	NA
Ostrea algoensis		Yes	Guo et al 2018	No	NA	No	NA	NA	NA	NA	NA	NA	NA	NA	NA	NA
Ostrea angelica		Yes	Guo et al 2018; Lodeiros et al 2020	No	NA	No	NA	NA	NA	NA	NA	NA	NA	NA	NA	NA
Ostrea atherstonei		Yes	Guo et al 2018	No	NA	No	NA	NA	NA	NA	NA	NA	NA	NA	NA	NA
Ostrea circumpicta		Yes	Guo et al 2018	No	NA	No	NA	NA	NA	NA	NA	NA	NA	NA	NA	NA
Ostrea equestris	Ostrea aupouria	Yes	Guo et al 2018	No	NA	No	NA	NA	NA	NA	NA	NA	NA	NA	NA	NA
Ostrea futamiensis		Yes	Guo et al 2018	No	NA	No	NA	NA	NA	NA	NA	NA	NA	NA	NA	NA
Ostrea libella		Yes	Guo et al 2018	No	NA	No	NA	NA	NA	NA	NA	NA	NA	NA	NA	NA
Ostrea megodon		Yes	Guo et al 2018	No	NA	No	NA	NA	NA	NA	NA	NA	NA	NA	NA	NA
Ostrea neostentina		No	NA	NA	NA	No	NA	NA	NA	NA	NA	NA	NA	NA	NA	NA
Ostrea permollis		Yes	Guo et al 2018	No	NA	No	NA	NA	NA	NA	NA	NA	NA	NA	NA	NA
Ostrea stentina		Yes	Guo et al 2018	No	NA	No	NA	NA	NA	NA	NA	NA	NA	NA	NA	NA
Pinctada capensis		No	NA	NA	NA	No	NA	NA	NA	NA	NA	NA	NA	NA	NA	NA
Pinctada chemnitzii		No	NA	NA	NA	No	NA	NA	NA	NA	NA	NA	NA	NA	NA	NA
Pinctada cumingii		No	NA	NA	NA	No	NA	NA	NA	NA	NA	NA	NA	NA	NA	NA
Pinctada galtsoffi		No	NA	NA	NA	No	NA	NA	NA	NA	NA	NA	NA	NA	NA	NA
Pinctada imbricata fucata	Pinctada fucata	No	NA	NA	NA	No	NA	NA	NA	NA	NA	NA	NA	NA	NA	NA
Pinctada inflata		No	NA	NA	NA	No	NA	NA	NA	NA	NA	NA	NA	NA	NA	NA
Pinctada longisquamosa		No	NA	NA	NA	No	NA	NA	NA	NA	NA	NA	NA	NA	NA	NA
Pinctada maculata		No	NA	NA	NA	No	NA	NA	NA	NA	NA	NA	NA	NA	NA	NA
Pinctada maxima		No	NA	NA	NA	No	NA	NA	NA	NA	NA	NA	NA	NA	NA	NA
Pinctada mazatlanica		No	NA	NA	NA	No	NA	NA	NA	NA	NA	NA	NA	NA	NA	NA
Pinctada petersii		No	NA	NA	NA	No	NA	NA	NA	NA	NA	NA	NA	NA	NA	NA
Pinctada reeveana		No	NA	NA	NA	No	NA	NA	NA	NA	NA	NA	NA	NA	NA	NA
Pinctada sugilata		No	NA	NA	NA	No	NA	NA	NA	NA	NA	NA	NA	NA	NA	NA
Pinctada vidua		No	NA	NA	NA	No	NA	NA	NA	NA	NA	NA	NA	NA	NA	NA
Pinctada nigra		No	NA	NA	NA	No	NA	NA	NA	NA	NA	NA	NA	NA	NA	NA
Pinna angustana		No	NA	NA	NA	No	NA	NA	NA	NA	NA	NA	NA	NA	NA	NA
Pinna atropurpurea		No	NA	NA	NA	No	NA	NA	NA	NA	NA	NA	NA	NA	NA	NA
Pinna attenuata		No	NA	NA	NA	No	NA	NA	NA	NA	NA	NA	NA	NA	NA	NA
Pinna bichi		No	NA	NA	NA	No	NA	NA	NA	NA	NA	NA	NA	NA	NA	NA
Pinna carnea		No	NA	NA	NA	No	NA	NA	NA	NA	NA	NA	NA	NA	NA	NA
Pinna cellophana		No	NA	NA	NA	No	NA	NA	NA	NA	NA	NA	NA	NA	NA	NA
Pinna deltodes		No	NA	NA	NA	No	NA	NA	NA	NA	NA	NA	NA	NA	NA	NA
Pinna dolabrata		No	NA	NA	NA	No	NA	NA	NA	NA	NA	NA	NA	NA	NA	NA
Pinna electrina		No	NA	NA	NA	No	NA	NA	NA	NA	NA	NA	NA	NA	NA	NA
Pinna epica		No	NA	NA	NA	No	NA	NA	NA	NA	NA	NA	NA	NA	NA	NA
Pinna exquisita		No	NA	NA	NA	No	NA	NA	NA	NA	NA	NA	NA	NA	NA	NA
Pinna fimbriatula		No	NA	NA	NA	No	NA	NA	NA	NA	NA	NA	NA	NA	NA	NA
Pinna incurva		No	NA	NA	NA	No	NA	NA	NA	NA	NA	NA	NA	NA	NA	NA
Pinna linguafelis		No	NA	NA	NA	No	NA	NA	NA	NA	NA	NA	NA	NA	NA	NA
Pinna madida		No	NA	NA	NA	No	NA	NA	NA	NA	NA	NA	NA	NA	NA	NA
Pinna menkei		No	NA	NA	NA	No	NA	NA	NA	NA	NA	NA	NA	NA	NA	NA
Pinna muricata		No	NA	NA	NA	No	NA	NA	NA	NA	NA	NA	NA	NA	NA	NA
Pinna nobilis		No	NA	NA	NA	No	NA	NA	NA	NA	NA	NA	NA	NA	NA	NA
Pinna papyracea		No	NA	NA	NA	No	NA	NA	NA	NA	NA	NA	NA	NA	NA	NA
Pinna rapanui		No	NA	NA	NA	No	NA	NA	NA	NA	NA	NA	NA	NA	NA	NA
Pinna rudis		No	NA	NA	NA	No	NA	NA	NA	NA	NA	NA	NA	NA	NA	NA
Pinna rugosa		No	NA	NA	NA	No	NA	NA	NA	NA	NA	NA	NA	NA	NA	NA
Pinna sanguinolenta		No	NA	NA	NA	No	NA	NA	NA	NA	NA	NA	NA	NA	NA	NA
Pinna trigonalis		No	NA	NA	NA	No	NA	NA	NA	NA	NA	NA	NA	NA	NA	NA
Pinna trigonium		No	NA	NA	NA	No	NA	NA	NA	NA	NA	NA	NA	NA	NA	NA
Pinna wayae		No	NA	NA	NA	No	NA	NA	NA	NA	NA	NA	NA	NA	NA	NA
Pintada nigra		No	NA	NA	NA	No	NA	NA	NA	NA	NA	NA	NA	NA	NA	NA
Planostrea pestigris		Yes	Guo et al 2018	No	NA	No	NA	NA	NA	NA	NA	NA	NA	NA	NA	NA
Pteria admirabilis		No	NA	NA	NA	No	NA	NA	NA	NA	NA	NA	NA	NA	NA	NA
Pteria aegyptiaca		No	NA	NA	NA	No	NA	NA	NA	NA	NA	NA	NA	NA	NA	NA
Pteria atlantica		No	NA	NA	NA	No	NA	NA	NA	NA	NA	NA	NA	NA	NA	NA
Pteria avicular	Pteria producta	No	NA	NA	NA	No	NA	NA	NA	NA	NA	NA	NA	NA	NA	NA
Pteria bernhardi		No	NA	NA	NA	No	NA	NA	NA	NA	NA	NA	NA	NA	NA	NA
Pteria broomei		No	NA	NA	NA	No	NA	NA	NA	NA	NA	NA	NA	NA	NA	NA
Pteria brunnea		No	NA	NA	NA	No	NA	NA	NA	NA	NA	NA	NA	NA	NA	NA
Pteria bulliformis		No	NA	NA	NA	No	NA	NA	NA	NA	NA	NA	NA	NA	NA	NA
Pteria colymbus		No	NA	NA	NA	No	NA	NA	NA	NA	NA	NA	NA	NA	NA	NA
Pteria cooki		No	NA	NA	NA	No	NA	NA	NA	NA	NA	NA	NA	NA	NA	NA
Pteria dendronephthya		No	NA	NA	NA	No	NA	NA	NA	NA	NA	NA	NA	NA	NA	NA
Pteria fibrosa		No	NA	NA	NA	No	NA	NA	NA	NA	NA	NA	NA	NA	NA	NA
Pteria formosa		No	NA	NA	NA	No	NA	NA	NA	NA	NA	NA	NA	NA	NA	NA
Pteria gregata		No	NA	NA	NA	No	NA	NA	NA	NA	NA	NA	NA	NA	NA	NA
Pteria heteroptera	Pteria brevialata	No	NA	NA	NA	No	NA	NA	NA	NA	NA	NA	NA	NA	NA	NA
Pteria hirundo		No	NA	NA	NA	No	NA	NA	NA	NA	NA	NA	NA	NA	NA	NA
Pteria howensis		No	NA	NA	NA	No	NA	NA	NA	NA	NA	NA	NA	NA	NA	NA
Pteria lata		No	NA	NA	NA	No	NA	NA	NA	NA	NA	NA	NA	NA	NA	NA
Pteria levitata		No	NA	NA	NA	No	NA	NA	NA	NA	NA	NA	NA	NA	NA	NA
Pteria maccullochi		No	NA	NA	NA	No	NA	NA	NA	NA	NA	NA	NA	NA	NA	NA
Pteria maura		No	NA	NA	NA	No	NA	NA	NA	NA	NA	NA	NA	NA	NA	NA
Pteria peasei		No	NA	NA	NA	No	NA	NA	NA	NA	NA	NA	NA	NA	NA	NA
Pteria penguin	Pteria macroptera Pinctada penguin	No	NA	NA	NA	No	NA	NA	NA	NA	NA	NA	NA	NA	NA	NA
Pteria saltata	Austroptera saltata	No	NA	NA	NA	No	NA	NA	NA	NA	NA	NA	NA	NA	NA	NA
Pteria spectrum	Pteria scabriuscula	No	NA	NA	NA	No	NA	NA	NA	NA	NA	NA	NA	NA	NA	NA
Pteria sterna		No	NA	NA	NA	No	NA	NA	NA	NA	NA	NA	NA	NA	NA	NA
Pteria straminea		No	NA	NA	NA	No	NA	NA	NA	NA	NA	NA	NA	NA	NA	NA
Pteria tortirostris		No	NA	NA	NA	No	NA	NA	NA	NA	NA	NA	NA	NA	NA	NA
Pteria venezuelensis	Pteria attilatomasi	No	NA	NA	NA	No	NA	NA	NA	NA	NA	NA	NA	NA	NA	NA
Saccostrea circumsuta		No	NA	No	NA	No	NA	NA	NA	NA	NA	NA	NA	NA	NA	NA
Saccostrea malabonensis	Saccostrea cucullata	No	NA	No	NA	No	NA	NA	NA	NA	NA	NA	NA	NA	NA	NA
Saccostrea mordoides	Saccostrea mordax	No	NA	No	NA	No	NA	NA	NA	NA	NA	NA	NA	NA	NA	NA
Saccostrea spathulata	Saccostrea lineage J?	No	NA	No	NA	No	NA	NA	NA	NA	NA	NA	NA	NA	NA	NA
Saccostrea subtrigona		No	NA	No	NA	No	NA	NA	NA	NA	NA	NA	NA	NA	NA	NA
Striostrea denticulata		No	NA	No	NA	No	NA	NA	NA	NA	NA	NA	NA	NA	NA	NA
Talonostrea talonata	Crassostrea talonata	No	NA	No	NA	No	NA	NA	NA	NA	NA	NA	NA	NA	NA	NA

## Sheet: Tropical oysters
Accepted name	Alternative/previous name	Review	Review papers	Evidence of reef-building in reviews?	Type of evidence	Evidence of existing reefs in species search?	Location of existing reefs?	Reef-building source	Reef-building or gregarious?	Evidence of co-occurring oyster species in reviews/species search?	Mixed species reef sources	Species distribution in review + existing reefs?	Location found	Evidence of habitat associations in reviews?	Evidence of other habitat associations in species search?	Habitat associations sources	Additional notes
Crassostrea brasiliana	Crassostrea gasar	Yes	do Amaral and Simone 2014; Guo et al 2018	No	NA	Yes	Subtropical	Westphal and Ostrensky 2016	Reef-building	C. brasiliana + Crassostrea sp	Westphal and Ostrensky 2016	Tropical + Subtropical	Western Atlantic	Mangroves and rocks	No	do Amaral and Simone 2014
Crassostrea columbiensis		Yes	Guo et al 2018; Lodeiros et al 2020	Yes	"Attaches to mangrove roots and each other"	No	NA	Lodeiros et al 2020	Gregarious	No	NA	Tropical + Subtropical	Eastern Pacific	Mangroves	No	Lodeiros et al 2020
Crassostrea corteziensis		Yes	Guo et al 2018; Lodeiros et al 2020	Yes	"High diversity of species and invertebrate epibionts that use oyster shells as habitats confers the character of bioengineers"	No	NA	Lodeiros et al 2020	Reef-building	C. corteziensis + S. palmula	Lodeiros et al 2020	Tropical + Subtropical	Eastern Pacific	Rocks	No	Lodeiros et al 2020
Crassostrea rhizophorae		Yes	do Amaral and Simone 2014; Guo et al 2018; zuErmgassen et al 2020	Yes	Species of interest for reef restoration	No	NA	zuErmgassen et al 2020	Reef-building	No	NA	Tropical	Caribbean	Mangroves (exclusively)	No	do Amaral and Simone 2014; zuErmgassen et al 2020
Crassostrea tulipa	Crassostrea gasar	Yes	Guo et al 2018	No	NA	Yes	Tropical	Crow and Carney 2012	Reef-building	No	NA	Tropical	Eastern Atlantic	No	Mangroves and rocks	Crow and Carney 2012
Isognomon alatus		Yes	Benthotage et al 2020	No	NA	Yes	Subtropical	de la Cruz-Francisco et al 2019	Reef-building	No	NA	Tropical + Subtropical	Caribbean, eastern Pacific and Indo-Pacific	Mangroves	No	Benthotage et al 2020	Species reported from multiple locations but native to Caribbean
Isognomon bicolor		Yes	Benthotage et al 2020	No	NA	Yes	Subtropical	Henriques and Casarini 2009	Reef-building	No	NA	Tropical + Subtropical	Western Atlantic and Caribbean	Mangroves and coral reefs	No	Benthotage et al 2020
Isognomon ephippium		Yes	Alleway et al 2015; Benthotage et al 2020	Yes	Existing reefs and species of interest for restoration	Yes	Tropical and subtropical	Alleway et al 2015; Benthotage et al 2020	Reef-building	No	NA	Tropical + Subtropical	Indo-Pacific	Mangroves and coral reefs	No	Benthotage et al 2020
Isognomon nucleus	Isognomon acutirostris	Yes	Benthotage et al 2020	No	NA	Yes	Tropical	Samakraman et al 2010	Reef-building	Isognomon nucleus + S. cucullata	Samakraman et al 2010	Tropical	Indo-Pacific	No	Rocks	Samakraman et al 2010
Magallana angulata	Crassostrea angulata	Yes	Guo et al 2018; Reeves et al 2020	Yes	Species of interest for reef restoration	No	NA	Reeves et al 2020	Reef-building	No	NA	Tropical + Subtropical	Indo-Pacific, western Pacific	No	Mangroves and rocks	Wang et al 2010; Xia et al 2014
Magallana belcheri	Crassostrea belcheri M. cuttackensis M. gryphoides	Yes	Guo et al 2018	No	NA	Yes	Tropical + Subtropical	Nagi et al 2011; Naik and Gowda 2013; Aslam et al 2020	Reef-building	M. belcheri + M. bilineata M. belcheri + M. bilineata + S. cucullata	Nagi et al 2011; Aslam et al 2020; Naik and Gowda 2013	Tropical + Subtropical	Indo-Pacific and central Indian	No	Mangroves and rocks	Nagi et al 2011; Gastineau et al 2018
Magallana bilineata	Crassostrea bilineata Crassostrea iredalei Crassostrea madrasensis Crassostrea lugubris	Yes	Guo et al 2018	No	NA	Yes	Tropical + Subtropical	Naik and Gowda 2013; Aslam et al 2020; Lau et al 2020	Reef-building	M. belcheri + M. bilineata M. belcheri + M. bilineata + S. cucullata	Nagi et al 2011; Aslam et al 2020; Naik and Gowda 2013	Tropical + Subtropical	Indo-Pacific and central Indian	No	Mangroves and rocks	Nagi et al 2011; Lam and Morton 2004; Lau et al 2020
Magallana hongkongensis	Crassostrea hongkongensis	Yes	Guo et al 2018	No	NA	Yes	Tropical	Lau et al 2020	Reef-building	M. hongkongensis + M. sikamea + T. zhanjiangensis	Wu et al 2013	Tropical	Indo-Pacific	No	Mangroves and rocks	Lam and Morton 2003; Lam and Moreton 2004; Xia et al 2014
Ostrea conchaphila		Yes	Polson et al 2009; Guo et al 2018; Lodeiros et al 2020	Yes	Referred to as reef-building	No	NA	Polson et al 2009	Reef-building	No	NA	Tropical + Subtropical	Eastern Pacific	Rocks	No	Polson et al 2009
Pinctada imbricata	Pinctada imbricata radiata	No	NA	NA	NA	Yes - historical	Tropical	Romero 2003	Reef-building	No	NA	Tropical	Western Atlantic	NA	NA	NA	This species is reported on from around the world, however is likely native to the Caribbean. Generally there are taxonomic confusions of Pinctada imbricata radiata
Pinctada margaritifera		No	NA	NA	NA	No, but pictures of gregarious clumps	NA	Sims 1993	Gregarious	P. margaritifera + S. cucullata	Alagarswami 1983	Tropical	Indo-Pacific	No	Coral	Alagarswami 1983; Sims 1993
Pinctada radiata	Pinctada radiata	No	NA	NA	NA	Yes	Subtropical	Al-Khayat and Al-Ansi 2008	Reef-building	No	NA	Subtropical	Arabian Gulf	NA	Rocks and corals	Al-Khayat and Al-Ansi 2008
Saccostrea cucullata		Yes	do Amaral and Simone 2016; Gillies et al 2018; Guo et al 2018; Reeves et al 2020	Yes	Referred to as reef-building	Yes	Tropical	Sundaram 1988; Naik and Gowda 2013	Reef-building	Isognomon nucleus + S. cucullata M. belcheri + M. bilineata + S. cucullata	Samakraman et al 2010; Naik and Gowda 2013	Tropical + Subtropical	Indo-Pacific and central Indian	No	Mangroves and rocks	Lam and Morton 2004; Yahya et al 2020
Saccostrea echinata	Saccostrea mytiloides Saccostrea lineage B?	Yes	do Amaral and Simone 2016; Gillies et al 2018; Guo et al 2018	Yes	NA	No	NA	Gillies et al 2018	Reef-building	No	NA	Tropical + Subtropical	Indo-Pacific and western Pacific	No	Mangroves	Yahya et al 2020
Saccostrea palmula	Saccostrea tubulifera	Yes	Guo et al 2018; Lodeiros et al 2020	No	NA	Yes	Subtropical	Cáceres-Martínez et al 2012	Reef-building	C. corteziensis + S. palmula	Lodeiros et al 2020	Tropical + Subtropical	Eastern Pacific	Mangroves and rocks	No	Lodeiros et al 2020
Saccostrea scyphophilla	Crassostrea amasa Saccostrea mordax	Yes	do Amaral and Simone 2016; Guo et al 2018	No	NA	No, but reference to reef-building	Tropical	Peck 2019	Reef-building	No	NA	Tropical	Indo-Pacific and western Pacific	Rocks and wholly marine environments	Mangroves	do Amaral and Simone 2016; Yahya et al 2020	Mangrove associations unlikely as this is a marine species
Striostrea margaritacea		Yes	Guo et al 2018	No	NA	Yes	Subtropical	Dye et al 1994	Reef-building	No	NA	Tropical + Subtropical	Eastern Atlantic	No	Rocks	Dye et al 1994
Striostrea prismatica		Yes	Guo et al 2018; Ríos-González et al 2018; Lodeiros et al 2020	Yes	Existing reefs	Yes	Tropical + Subtropical	Ríos-González et al 2018; Campos and Fournier 1989	Reef-building	No	NA	Tropical + Subtropical	Eastern Pacific	Rocks	No	Lodeiros et al 2020
Talonostrea salpinx		No	NA	NA	NA	Yes	Subtropical	Al-Kandari et al 2021	Reef-building	No	NA	Subtropical	Arabian Gulf	NA	Rocks	Al-Kandari et al 2021
Talonostrea zhanjiangensis	Crassostrea zhanjiangensis	Yes	Guo et al 2018	No	NA	No, but pictures of gregarious clumps	Tropical	Wu et al 2013	Gregarious	M. hongkongensis + M. sikamea + T. zhanjiangensis	Wu et al 2013	Tropical	Indo-Pacific	NA	Rocks	Wu et al 2013

## Sheet: Eurythermal oysters
Accepted name	Alternative/previous name	Review	Review papers	Evidence of reef-building in reviews?	Type of evidence	Evidence of existing reefs in species search?	Location of existing reefs?	Reef-building source	Reef-building or gregarious?	Evidence of co-occurring oyster species in reviews/species search?	Mixed species reef sources	Species distribution in review + existing reefs?	Location found	Evidence of habitat associations in reviews?	Evidence of other habitat associations in species search?	Habitat associations sources	Additional notes
Crassostrea virginica	Crassostrea virginica	Yes	do Amaral and Simone 2014; Guo et al 2018; Reeves et al 2020; Hernandez et al 2018	Yes	Existing remnant and restored reefs	Yes	Subtropical + Temperate	Hernandez et al 2018	Reef-building	No	NA	Tropical + Subtropical + Temperate	Western Atlantic	Rocks	Mangroves	Aquino-Thomas and Proffitt 2014; Hernandez et al 2018
Isognomon isognomum	Isognomon attenuata	Yes	Benthotage et al 2020	Yes	Existing reefs	Yes	Tropical + Temperate	Noseworthy et al 2016	Reef-building	Isognomon isognomum + Malleus regula	Yonge 1968; Noseworthy et al 2016	Tropical + Subtropical + Temperate	Indo-Pacific and western Pacific	Coral reefs	Rocks	Noseworthy et al 2016; Benthotage et al 2020	Malleus genus (hammer oysters) not included in review
Magallana ariakensis	Crassostrea ariakensis Crassostrea rivularis	Yes	Zhou and Allen 2003; Guo et al 2018; Reeves et al 2020; zuErmgassen et al 2020	Yes	Existing reefs and species of interest for restoration	Yes	Subtropical	Zhou and Allen 2003; Wang et al 2018; Reeves et al 2020; Quan et al 2020	Reef-building	M. ariakensis + M. sikamea M. ariakensis + M. gigas + M. sikamea + O. denselamellosa	Wang et al 2020 zuErmgassen et al 2020	Tropical + Subtropical + Temperate	Indo-Pacific, western Pacific	Rocks	Mangroves	Zhou and Allen 2003; Xia et al 2014
Magallana gigas	Crassostrea gigas	Yes	do Amaral and Simone 2014; Guo et al 2018; McAfee and Connell 2020; Reeves et al 2020; zuErmgassen et al 2020	Yes	Existing reefs	Yes	Subtropical + Temperate	McAfee and Connell 2020; Reeves et al 2020	Reef-building	M. ariakensis + M. gigas + M. sikamea + O. denselamellosa	zuErmgassen et al 2020	Tropical + Subtropical + Temperate	Indo-Pacific, western Pacific	Rocks	No	do Amaral and Simone 2014; McAfee and Connell 2020; Reeves et al 2020
Magallana sikamea	Crassostrea sikamea	Yes	Guo et al 2018; zuErmgassen et al 2020	Yes	Species of interest for reef restoration	No, but reference to reef-building	Subtropical	Wang et al 2013; Wang et al 2018	Reef-building	M. ariakensis + M. sikamea M. hongkongensis + M. sikamea + T. zhanjiangensis M. ariakensis + M. gigas + M. sikamea + O. denselamellosa	Wang et al 2020 Wu et al 2013 zuErmgassen et al 2020	Tropical + Subtropical + Temperate	Indo-Pacific, western Pacific	No	Mangroves and rocks	Wang et al 2013; Xia et al 2014
Ostrea denselamellosa		Yes	Guo et al 2018; zuErmgassen et al 2020	Yes	Species of interest for reef restoration	No	NA	zuErmgassen et al 2020	Reef-building	M. ariakensis + M. gigas + M. sikamea + O. denselamellosa	zuErmgassen et al 2020	Tropical + Subtropical + Temperate	Indo-Pacific, western Pacific	No	No	NA
Saccostrea kegaki		Yes	Guo et al 2018	No	NA	No, but reference to as a foundation species	NA	Tomatsuri and Kon 2017	Reef-building	No	NA	Tropical + Subtropical + Temperate	Indo-Pacific and western Pacific	NA	Mangroves	Yahya et al 2020

## Sheet: Temperate oysters
Accepted name	Alternative/previous name	Review	Review papers	Evidence of reef-building in reviews?	Type of evidence	Evidence of existing reefs in species search?	Location of existing reefs?	Reef-building source	Reef-building or gregarious?	Evidence of co-occurring oyster species in reviews/species search?	Mixed species reef sources	Species distribution in review + existing reefs?	Location found	Evidence of habitat associations in reviews?	Evidence of other habitat associations in species search?	Habitat associations sources	Additional notes
Ostrea angasi		Yes	Guo et al 2018; Gillies et al 2020; Reeves et al 2020; zuErmgassen et al 2020	Yes	Existing reefs and species of interest for restoration	Yes	Temperate	Gillies et al 2020; Reeves et al 2020; zuErmgassen et al 2020	Reef-building	No	NA	Temperate	Western South Pacific and Southern Ocean (Australia)	NA	NA	NA
Ostrea chilensis		Yes	Guo et al 2018	No	NA	Yes	Temperate	Cranfield 1979	Reef-building	No	NA	Temperate	South Pacific	NA	NA	NA
Ostrea edulis		Yes	Guo et al 2018; Reeves et al 2020; zuErmgassen et al 2020	Yes	Existing reefs and species of interest for restoration	Yes	Temperate	Bennema et al 2020	Reef-building	No	NA	Temperate	Eastern north Atlantic and North Sea	NA	NA	NA
Ostrea lurida		Yes	Pritchard et al 2015; Guo et al 2018; Reeves et al 2020	Yes	Existing reefs and species of interest for restoration	Yes	Temperate	Pritchard et al 2015; Reeves et al 2020	Reef-building	No	NA	Temperate	Eastern north Pacific	NA	NA	NA
Ostrea puelchana		Yes	Guo et al 2018	No	NA	Yes	Temperate	Doldan et al 2021	Reef-building	No	NA	Temperate	Eastern south Pacific	NA	NA	NA
Saccostrea glomerata	Saccostrea commercialis	Yes	Alleway et al 2015; Guo et al 2018; Gillies et al 2020; Reeves et al 2020	Yes	Existing reefs	Yes	Subtropical + Temperate	Gillies et al 2020	Reef-building	S. glomerata + Pinctada sp	Alleway et al 2015	Subtropical + Temperate	Western South Pacific	NA	NA	NA

## Sheet: Sources
Title	Author	Year
Form and habitat in species of Malleus (including the "hammer oysters") with comparative observations on Isognomon isognomon	Yonge	1968
The biology of the oyster, Ostrea lutaria, and the oyster fishery of Foveaux Strait	Cranfield	1979
Rock oyster resources of Bombay coast	Sundaram	1988
El banco de Ostrea iridescens (Pterioida: Ostreidae) de Bahía Curú, Costa Rica	Campos and Fournier	1989
Near shore Marine Resources of the South Pacific. Institute of Pacific Studies, Suva, Forum Fisheries Agency, Honiara and International Centre for Ocean Development, Canada	Sims	1993
Intertidal and subtidal filter-feeders in southern Africa	Dye et al	1994
Mitochondrial DNA and morphological identification of a new species of Crassostrea (Bivalvia: Ostreidae) cultured for centuries in the Pearl River Delta, Hong Kong, China	Lam and Morton	2003
Death and Taxes: the Case of the Depletion of Pearl Oyster Beds in Sixteenth-Century Venezuela	Romero	2003
A Review Of Published Work On Crassostrea Ariakensis	Zhou and Allen	2003
The oysters of Hong Kong (Bivalvia: Ostreidae and Gryphaeidae)	Lam and Morton	2004
Ecological Features of Oyster Beds Distribution in Qatari Waters, Arabian Gulf	Al-Khayat and Al-Ansi	2008
Growth evaluation of brown mussel Perna perna and invasive bivalve Isognomon bicolor of a natural bed in Palmas Island, Santos Bay, São Paulo State, Brazil	Henriques and Casarini	2009
You say Conchaphila, I say Lurida: Molecular ecvidence for restricting the Olympia oyster (Ostrea lurida Carpernter 1864) to temperate western North America	Polson et al	2009
Spatial and Temporal Variability of Intertidal Rocky Shore Bivalves and Gastropods in Sichang Island, East Coast of Thailand	Samakraman et al	2010
Classification of a common cupped oyster from Southern China	Wang et al	2010
Dimensional relationships in Crassostrea madrasensis (Preston) and C. gryphoides (Schlotheim) in mangrove ecosystem	Nagi et al	2011
Natural and cultured populations of the mangrove oyster Saccostrea palmula from Sinaloa, Mexico, infected by Perkinsus marinus	Cáceres-Martínez et al	2012
Commercializing Nature: Mangrove Conservation and Female Oyster Collectors in The Gambia	Crow and Carney	2012
Survey of oyster beds of Mulky estuary, south-west coast of India	Naik and Gowda	2013
Occurrence and distribution of Crassostrea Sikamea (Amemiya 1928) in China	Wang et al	2013
Mitochondrial DNA and morphological identification of Crassostrea zhanjiangensis sp. nov. (Bivalvia: Ostreidae): a new species in Zhanjiang, China	Wu et al	2013
Oysters Crassostrea virginica on red mangrove Rhizophora mangle prop roots: facilitation of one foundation species by another	Aquino-Thomas and Proffitt	2014
Revision of genus Crassostrea (Bivalvia: Ostreidae) of Brazil	do Amaral and Simone	2014
Mitochondrial DNA and morphological identification of a new cupped oyster species Crassostrea dianbaiensis (Bivalvia: Ostreidae) in the South China Sea	Xia et al	2014
Shellfish reef habitats: a synopsis to underpin the repair and conservation of Australia’s environmentally, socially and economically important bays and estuaries.	Alleway et al	2015
The Olympia oyster Ostrea lurida: recent advances in natural history, ecology and restoration	Pritchard et al	2015
Comparative anatomy of five species of Saccostrea Dollfus and Dautzenberg, 1920 (Bivalvia: Ostreidae) from the Pacific Ocean	do Amaral and Simone	2016
Comparative anatomy of five species of Saccostrea Dollfus and Dautzenberg, 1920 (Bivalvia: Ostreidae) from the Pacific Ocean	do Amaral and Simone	2016
Report of Malleus regula (forsskål in Niebuhr, 1775)(Bivalvia: Malleidae) in Korea	Noseworthy et al	2016
Use of side-scan sonar for estimations of Crassostrea brasiliana (Lamarck, 1819) stocks in subtidal banks on the south coast of Brazil	Westphal and Ostrensky	2016
Effects of dead oyster shells as a habitat for the benthic faunal community along rocky shore regions	Tomatsuri and Kon	2017
The complete mitochondrial DNA of the tropical oyster Crassostrea belcheri from the Cần Giò’ mangrove in Vietnam	Gastineau et al	2018
Australian shellfish ecosystems: past distribution, current status and future direction	Gillies et al	2018
Diversity and Evolution of Living Oysters	Guo et al	2018
Restoring the eastern oyster: how much progress has been made in 53 years?	Hernandez et al	2018
Rock oyster Striostrea prismatica (Gray, 1825): biology, exploitation and conservation	Ríos-González et al	2018
The development of two novel species-specific primers for identifying genus Crassostrea, with focus on C. sikamea and C. ariakensis	Wang et al	2018
First record of Amorphinopsis atlantica Carvalho, Hadju, Mothes & van Soest, 2004 (Family: Halichondriidae) for a lagoon system in the Gulf of Mexico	de la Cruz-Francisco et al	2019
Feasibility of shellfish reef restoration in a south-western Australian estuary	Peck	2019
Biodiversity on intertidal oyster reefs in the Hab River mouth: 35 new records from Pakistan	Aslam et al	2020
Ostrea edulis beds in the central North Sea: delineation, ecology, and restoration	Bennema et al	2020
A review of the biology of the genus Isognomon (Bivalvia; Pteriidae) with a discussion on shellfish reef restoration potential of Isognomon ephippium	Benthotage et al	2020
Conservation status of the Oyster Reef Ecosystem of Southern and Eastern Australia	Gillies et al	2020
Restoration potential of Asian oysters on heavily developed coastlines	Lau et al	2020
Tropical and Subtropical Ostreidae of the American Pacific: Taxonomy, Biology, Ecology, and Genetics	Lodeiros et al	2020
The global fall and rise of oyster reefs	McAfee and Connell	2020
Seasonal and temporal changes in the Kumamoto oyster Crassostrea sikamea population and associated benthic macrofaunal communities at an intertidal oyster reef in China	Quan et al	2020
Facilitating Better Outcomes: How Positive Species Interactions Can Improve Oyster Reef Restoration	Reeves et al	2020
Intertidal zonation of the Suminoe oyster Crassostrea ariakensis and the Kumamoto oyster Crassostrea sikamea on the coast of the northern east China Sea	Wang et al	2020
Mangrove-associated bivalves in Southeast Asia: A review	Yahya et al	2020
The benefits of bivalve reef restoration: A global synthesis of underrepresented species	zu Ermgassen et al	2020
Molecular and morphological systematics of a new, reef forming, cupped oyster from the northern Arabian Gulf: Talonostrea salpinx new species	Al-Kandari-et al	2021
Population dynamics of the native oyster Ostrea puelchana d'Orbigny, 1842 in north-patagonian gulfs, Argentina: A multiscale spatial approach	Doldan et al	2021

## Sheet: PRD place names and lime kilns
Oyster place name	Lat	Long	Source		Lime Kiln	Lat	Long	Source
Ho Chung Village	22.356	114.247	Google maps		Sheung Yu	22.39	114.32	Google maps
Ho Chung Valley	22.352	114.238	Google maps		Ancient Kiln Park	22.296	113.935	Google maps
Macao	22.175	113.532	Google maps		Ruins of shengli ash kiln factory/Peng Chau	22.28	114.041	Google maps
Haopai	22.032	113.315	Google maps		Tsing Yi	22.347	114.102	Google maps
Haoye	22.735	113.805	Google maps		Fui Yiu Ha	22.38	114.266	Google maps
Haotougang	22.82	113.491	Google maps		Fui Yiu Ha	22.376	114.197	Google maps
Haoyecun	22.574	113.869	Google maps		Fui Yiu Kok St	22.366	114.117	Google maps
Haokedun	22.525	114.032	Google maps		Lime Kilns at Hoi Ha	22.46	114.33	Google maps
Haotiandao	22.325	113.616	Google maps		4 x lime kilns at Laufaushan	22.468	113.984	Watson 2021
Haokezhou	23.063	113.28	Google maps		set of kilns near Mong Jeng (now Mong Tseng Wai?)	22.481	114.009	Watson 2021
蠔殼山 oyster shell mountain	22.429	114.05	Google maps
Haotan	22.775	113.709	Google maps
Hoo Hok Wai	22.534	114.09	Google maps
Haomenwei	22.389	113.326	Google maps

## Sheet: Reef density, abund & biomass
Accepted name	Evidence of existing reefs in species search?	Location of existing reefs?	Number of reefs	Total aerial cover	Average live oyster density/m2	Oyster abundance	Reef biomass	Reef-building source	Notes
Crassostrea brasiliana	Yes	Subtropical	Not reported	4702	0.2	21159	Not reported	Westphal and Ostrensky 2016	Reef size calculated by dividing oyster abundance by density (1 oyster/4.5m2)
Crassostrea tulipa	Yes	Tropical	Not reported	Not reported	Not reported	Not reported	Not reported	Crow and Carney 2012	200/mangrove root
Isognomon alatus	Yes	Subtropical	Not reported	Not reported	Not reported	Not reported	Not reported	de la Cruz-Francisco et al 2019	only a mention of Isgnomon alatus beds in English abstract
Isognomon bicolor	Yes	Subtropical	Not reported	Not reported	8375	Not reported	Not reported	Henriques and Casarini 2009	Invasive in Brazil, but densities up to 8375/m2
Isognomon ephippium	Yes	Tropical and subtropical	Not reported	Not reported	Not reported	Not reported	Not reported	Alleway et al 2015
Isognomon ephippium	Yes	Tropical and subtropical	Not reported	Not reported	Not reported	Not reported	Not reported	Benthotage et al 2021
Isognomon nucleus + Saccostrea cucullata	Yes	Tropical	Not reported	Not reported	8000+	Not reported	Not reported	Samakraman et al 2010	4000+/0.25*0.25 (isognomon) 800+/0.25*0.25 (saccostrea)
Magallana belcheri + M. bilineata	Yes	Tropical + Subtropical	Not reported	Not reported	349	Not reported	Not reported	Nagi et al 2011	969.6*0.36 (to calculate live oyster density) M. bilineata = 63.66-72.46% M. belcheri = 27.54-36.34%
Magallana belcheri + M. bilineata	Yes	Tropical + Subtropical	Not reported	Not reported	Not reported	Not reported	Not reported	Aslam et al 2020
Magallana belcheri +M. bilineata + S. cucullata	Yes	Tropical + Subtropical	25	53488	6 - 100	Not reported	Not reported	Naik and Gowda 2013	Reef size varying from 49.17 - 18528m2, total area 53, 488 High density reefs: 32556.36m2 Low density reefs: 20932m2
Magallana bilineata	Yes	Tropical + Subtropical	10	91000	1.1 - 100.6	Not reported	Not reported	Lau et al 2020	1.1-14.1/m2 public access 28.2-92.1m2 restricted access highest average 100.6/m2
Magallana hongkongensis	Yes	Tropical	10	91000	1.1 - 100.6	Not reported	Not reported	Lau et al 2020
Pinctada radiata	Yes	Subtropical	Not reported	Not reported	21.7 - 50	Not reported	Not reported	Al-Khayat and Al-Ansi 2008
Saccostrea cucullata	Yes	Tropical	2	87500	616 - 1062	80.66million	Not reported	Sundaram 1988	Very broken online translation and information difficult to extract.
Saccostrea palmula	Yes	Subtropical	Not reported	Not reported	Not reported	Not reported	Not reported	Cáceres-Martínez et al 2012
Striostrea margaritacea	Yes	Subtropical	Not reported	Not reported	Not reported	Not reported	Not reported	Dye et al 1994
Striostrea prismatica	Yes	Tropical + Subtropical	Not reported	Not reported	176	Not reported	Not reported	Campos and Fournier 1989
Talonostrea salpinx	Yes	Subtropical	Not reported	Not reported	Not reported	Not reported	Not reported	Al-Kandari et al 2021

## Sheet: Trove oyster beds & reefs
Newspaper	Year	Title	Location	No. of beds	Bed size	Notes	Website	Methods	Newspapers searched
Morning Bulletin (Rockhampton) + Daily Mercury (Mackay)	1935	Colony for Barrier Reef	4miles from Tam O'Shanter Point	2	Not reported	2+	https://trove.nla.gov.au/newspaper/article/55552608?searchTerm=%22oyster%20beds%22		Morning Bulletin Rockhampton
Morning Bulletin (Rockhampton) + Daily Mercury (Mackay) + Townsville Daily Bulletin + Cairns Post	1934	FOR POOR BOYS Island Paradise BARRIER REEF Scheme Mooted In London LONDON + Island Scheme on Great Barrier Reef	4miles from Tam O'Shanter Point	1	Not reported		https://trove.nla.gov.au/newspaper/article/55529114?searchTerm=%22oyster%20beds%22		Daily Mercury Mackay
The Evening News (Rockhampton)	1934	FOR POOR BOYS BARRIER REEF LONDON, March 10.	4miles from Tam O'Shanter Point	1	Not reported		https://trove.nla.gov.au/newspaper/article/70316478?searchTerm=%22oyster%20beds%22		Townsville Daily Bulletin
The Evening News (Rockhampton)	1934	SCHEME TO PLACE BOYS ON TROPICAL ISLAND. FARMING, FORESTRY, AND ARTS. BARRIER REEF. LONDON, Saturday.	4miles from Tam O'Shanter Point	1	Not reported		https://trove.nla.gov.au/newspaper/article/198725379?searchTerm=%22oyster%20beds%22		Cairns Post
Morning Bulletin (Rockhampton)	1904	QUEENSLAND NEWS. [By Telegraph.] BRISBANE	Alligator Creek	1	Not reported	"quality of oysters is unsurpassed in Australia"	https://trove.nla.gov.au/newspaper/article/53021757?searchTerm=%22oyster%20beds%22		The Capricornian
The North Queensland Register (Townsville)	1905	Dredging oysters	Alligator Creek	1	Large		https://trove.nla.gov.au/newspaper/article/85546639?searchTerm=%22oyster%20beds%22		The Evening News (Rockhampton)
Johnstone River Advocate and Innisfail News	1936	Advertising	Bingil Bay	2		2+	https://trove.nla.gov.au/newspaper/article/212639085?searchTerm=%22oyster%20beds%22		The Central Queensland Herald (Rockhampton)
Townsville Daily Bulletin	1933	Bowen notes	Bowen	2	Not reported	"if a dozen or so are smashed up for every one swallowed, "well there are plenty more"".2+	https://trove.nla.gov.au/newspaper/article/61373261?searchTerm=%22oyster%20beds%22		The Daily Northern Argus (Rockhampton)
Morning Bulletin (Rockhampton)	1911	GLADSTONE. (From Our Own Correspondent.)	Boyne Island	1	Not reported		https://trove.nla.gov.au/newspaper/article/53204520?searchTerm=%22oyster%20beds%22		The Nothern Herald (Cairns)
Morning Bulletin (Rockhampton)	1911	GLADSTONE. (From Our Own Correspondent.)	Boyne River	1	Not reported		https://trove.nla.gov.au/newspaper/article/53204520?searchTerm=%22oyster%20beds%22		Chronicle and North Coast Advisor
Bowen Independent	1925	Personal	Burdekin River	2	Not reported	2+	https://trove.nla.gov.au/newspaper/article/193110458?searchTerm=%22oyster%20beds%22		The North Queensland Register
Morning Bulletin (Rockhampton)	1911	GLADSTONE. (From Our Own Correspondent.)	Bustard Head	1	Not reported		https://trove.nla.gov.au/newspaper/article/53204520?searchTerm=%22oyster%20beds%22		Bowen Independent (Queensland)
Morning Bulletin (Rockhampton)	1909	Gladstone. (From our own correspondent)	Bustard Head	3	Not reported		https://trove.nla.gov.au/newspaper/article/53181212?searchTerm=%22oyster%20beds%22		Rockhampton Bulletin
The Capricornian	1909	Gladstone	Bustard Head	3	Not reported		https://trove.nla.gov.au/newspaper/article/71970324?searchTerm=%22oyster%20beds%22		Morning Post (Cairns)
Cairns Post	1921	Freshwater Notes	Cairns	1	Not reported		https://trove.nla.gov.au/newspaper/article/40127505?searchTerm=%22oyster%20beds%22		The Evening Advocate (Innisfail)
Morning Post (Cairns)	1901	Oysters	Cairns	1			https://trove.nla.gov.au/newspaper/article/42948983?searchTerm=%22oyster%20beds%22		Cairns Post (Queensland)
The North Queensland Register (Townsville)	1901	NORTH QUEENSLAND REGISTER WITH WHICH IS INCORPORATED THE NORTHERN MINING REGISTER CURRENT NOTES.	Cairns	1	Not reported		https://trove.nla.gov.au/newspaper/article/85562824?searchTerm=%22oyster%20beds%22		Pittsworth Sentinel
The Northern Herald (Cairns)	1921	Freshwater Notes	Cairns	1	Not reported		https://trove.nla.gov.au/newspaper/article/147997425?searchTerm=%22oyster%20beds%22		Torres News
Townsville Daily Bulletin	1930	Ingham notes	Cape Richards	2	Not reported	2+	https://trove.nla.gov.au/newspaper/article/61040957?searchTerm=%22oyster%20beds%22		Cairns Morning Post
Townsville Daily Bulletin	1933	Ingham notes	Cape Richards	2	Not reported	2+	https://trove.nla.gov.au/newspaper/article/61725513?searchTerm=%22oyster%20beds%22		Johnston River Advocate and Innisfail News
Daily Mercury (Mackay) + Townsville Daily Bulletin	1934	Italian Drowned. TRAGEDY AT AYR. BOAT CAPJSIZED.	Cape upstart	1	Not reported		https://trove.nla.gov.au/newspaper/article/172965152?searchTerm=%22oyster%20beds%22		Mackay Mercury and South Kennedy Advertiser
Morning Post (Cairns)	1904	Late	Cape upstart	1	3/4 of a mile		https://trove.nla.gov.au/newspaper/article/42958304?searchTerm=%22oyster%20beds%22		Northern Argus
Cairns Post	1925	NEWS OF THE NORTH. CARDWELL NEWS	Cardwell (inlet)	2	Not reported	2+	https://trove.nla.gov.au/newspaper/article/40475847?searchTerm=%22oyster%20beds%22		Rockhampton Bulletin and Central Queensland Advisor
The Northern Herald (Cairns)	1925	CARDWELL NEWS. Cardwell	Cardwell (inlet)	2	Not reported	2+	https://trove.nla.gov.au/newspaper/article/149469513?searchTerm=%22oyster%20beds%22		The Proserpine Guardian
Townsville Daily Bulletin	1925	Cardwell Notes. Cardwell	Cardwell (inlet)	2	Not reported	2+	https://trove.nla.gov.au/newspaper/article/61570368?searchTerm=%22oyster%20beds%22
Morning Bulletin (Rockhampton)	1926	"Uncle Sam's" letter bag	Carmilla	1	Not reported	"7ft syrup tin full of oysters in a vert short time"	https://trove.nla.gov.au/newspaper/article/54321222?searchTerm=%22oyster%20beds%22
The Capricornian	1926	"Uncle Sam's" letter bag	Carmilla	1	Not reported	"7ft syrup tin full of oysters in a vert short time"	https://trove.nla.gov.au/newspaper/article/72020197?searchTerm=%22oyster%20beds%22
Rockhampton Bulletin and Central QLD Advertiser	1870	The Rockhamption Balletin AND CENTRAL QUEENSLAND ADVERTISER	Cassarina Creek (Casuarina Creek?)	2	Not reported	Old lyster shells in some place to 4 feet (1.22m)thick. 2+	https://trove.nla.gov.au/newspaper/article/51581073?searchTerm=%22oyster%20beds%22
The Rockhampton Bulletin and Central Queensland Advertiser	1870	The Rockhamption Bulletin AND CENTRAL QUEENSLAND ADVERTISER	Cassarina Creek (Casuarina Creek?)	2	Not reported	Old lyster shells in some place to 4 feet (1.22m)thick. 2+	https://trove.nla.gov.au/newspaper/article/51581073?searchTerm=%22oyster%20beds%22
Townsville Daily Bulletin	1926	Clump Point	Clump Point (boatramp)	2	Not reported	2+	https://trove.nla.gov.au/newspaper/article/60923294?searchTerm=%22oyster%20beds%22
Morning Bulletin (Rockhampton) + The Capricornian	1910	The fishing industry	Conical Island	1	Not reported		https://trove.nla.gov.au/newspaper/article/53131748?searchTerm=%22oyster%20beds%22
The Capricornian	1910	The fishing industry	Conical Island	1	Not reported		https://trove.nla.gov.au/newspaper/article/69126137?searchTerm=%22oyster%20beds%22
Morning Bulletin (Rockhampton)	1935	TWENTY-FIVE YEARS AGO From Our Back Files	Connors Creek to E Balaclava Island	3	30 acres/12.14ha		https://trove.nla.gov.au/newspaper/article/55533673?searchTerm=%22oyster%20beds%22
Morning Bulletin (Rockhampton)	1929	Keppel sands and sandhills	Coorooman Creek (near emu park)	2	Not reported	"Maintenance of oyster beds in close proximity to a resort would call for armed guards". 2+	https://trove.nla.gov.au/newspaper/article/54648405?searchTerm=%22oyster%20beds%22
The Capricornian	1929	KEPPEL SANDS AND SANDHILLS. RISING SEASIDE RESORTS. THEIR HISTORY AND FEATURES.	Coorooman Creek (near emu park)	2	Not reported	"Maintenance of yster beds in close proximity to a resort would call for armed guards". 2+	https://trove.nla.gov.au/newspaper/article/72048277?searchTerm=%22oyster%20beds%22
Morning Bulletin (Rockhampton) + The Capricornian	1910	The fishing industry	Corroboree Island	1	Not reported		https://trove.nla.gov.au/newspaper/article/53131748?searchTerm=%22oyster%20beds%22
The Capricornian	1910	The fishing industry	Corroboree Island	1	Not reported		https://trove.nla.gov.au/newspaper/article/69126137?searchTerm=%22oyster%20beds%22
Morning Bulletin (Rockhampton)	1934	Oyster leases Port Curtis Harbour	Curtis Island (S end)	1	Not reported	Strict enforcements - leases at locations not granted	https://trove.nla.gov.au/newspaper/article/55527519?searchTerm=%22oyster%20beds%22
Cairns Post (QLD)	1888	A yachting cruie	Double Island (Ellis Beach)	1			https://trove.nla.gov.au/newspaper/article/39426671?searchTerm=%22oyster%20beds%22
Morning Bulletin (Rockhampton)	1934	Oyster leases Port Curtis Harbour	Ethel Rocks	1	Not reported	Strict enforcements - leases at locations not granted	https://trove.nla.gov.au/newspaper/article/55527519?searchTerm=%22oyster%20beds%22
Morning Bulletin (Rockhampton)	1934	Oyster leases Port Curtis Harbour	Facing Island (Clump Point)	1	Not reported	Strict enforcements - leases at locations not granted	https://trove.nla.gov.au/newspaper/article/55527519?searchTerm=%22oyster%20beds%22
Morning Bulletin (Rockhampton)	1934	Oyster leases Port Curtis Harbour	Facing Island (N end)	1	Not reported	Strict enforcements - leases at locations not granted	https://trove.nla.gov.au/newspaper/article/55527519?searchTerm=%22oyster%20beds%22
Daily Mercury (Mackay)	1939	At the beaches	Far Beach	2	Not reported	2+	https://trove.nla.gov.au/newspaper/article/170000563?searchTerm=%22oyster%20beds%22
The evening Advocate (Innisfail)	1941	Cowley Benefit For Ambulance	Flying Fish Point	1			https://trove.nla.gov.au/newspaper/article/215471935?searchTerm=%22oyster%20beds%22
Townsville Daily Bulletin	1933	Ingham notes	Garden Island	2	Not reported	2+	https://trove.nla.gov.au/newspaper/article/61713307?searchTerm=%22oyster%20beds%22
Morning Bulletin (Rockhampton)	1911	GLADSTONE. (From Our Own Correspondent.)	Gatcombe Head (Southern point of facing island)	1	Not reported		https://trove.nla.gov.au/newspaper/article/53204520?searchTerm=%22oyster%20beds%22
Cairns Post	1925	NEWS OF THE NORTH. A TRIP TO GOULD ISLAND	Gould (Goold?) Island	1	Not reported	"Filled 5 sacks in an hour". Caution against overexploitation	https://trove.nla.gov.au/newspaper/article/40500167?searchTerm=%22oyster%20beds%22
The Northern Herald (Cairns)	1925	A TRIP TO COULD ISLAND	Gould (Goold?) Island	1	Not reported	"Filled 5 sacks in an hour". Caution against overexploitation	https://trove.nla.gov.au/newspaper/article/149468014?searchTerm=%22oyster%20beds%22
Cairns Post	1912	Marine Board Grants	Greta Creek, Port Denison?	1	Not reported		https://trove.nla.gov.au/newspaper/article/39915523?searchTerm=%22oyster%20beds%22
Morning Bulletin (Rockhampton) + The Capricornian	1910	The fishing industry	Halfway Island	1	Not reported		https://trove.nla.gov.au/newspaper/article/53131748?searchTerm=%22oyster%20beds%22
The Capricornian	1910	The fishing industry	Halfway Island	1	Not reported		https://trove.nla.gov.au/newspaper/article/69126137?searchTerm=%22oyster%20beds%22
Bowen Independent	1919	Distinguished Visitors	Hardup Island? Near Bowen	2	Not reported	2+	https://trove.nla.gov.au/newspaper/article/192388931?searchTerm=%22oyster%20beds%22
Townsville Daily Bulletin	1939	CAMERA CLUB. Trip to Palm Islands.	Havanna Island	2	Not reported	2+	https://trove.nla.gov.au/newspaper/article/62451197?searchTerm=%22oyster%20beds%22
Townsville Daily Bulletin	1931	A fisherman's paradise	Hillock Point to Cape Richards	2	Not reported	2+	https://trove.nla.gov.au/newspaper/article/61140523?searchTerm=%22oyster%20beds%22
The Evening News (Rockhampton)	1926	"LET THEM ROT!" Hummocky Oysters. FISHERMEN AT VARIANCE.	Hummocky Island	2	Not reported	2+	https://trove.nla.gov.au/newspaper/article/201573683?searchTerm=%22oyster%20beds%22
Morning Bulletin (Rockhampton)	1902	Visit of the fisheries expert	Keppel Bay	2	Not reported	Beds becoming depleted. 2+	https://trove.nla.gov.au/newspaper/article/52750864?searchTerm=%22oyster%20beds%22
The Capricornian	1902	Visit of the fisheries expert	Keppel Bay	2	Not reported	Beds becoming depleted. 2+	https://trove.nla.gov.au/newspaper/article/68270361?searchTerm=%22oyster%20beds%22
Morning Bulletin (Rockhampton)	1907	Illegal fishing	Keppel Islands	2	Not reported	Beds becoming depleted - "where reefs have been cleaned of bivalves their restration must be the work of years". 2+	https://trove.nla.gov.au/newspaper/article/53111769?searchTerm=%22oyster%20beds%22
The Capricornian	1907	Illegal Fishing	Keppel Islands	2	Not reported	Unsustainable harvesting documented. 2+	https://trove.nla.gov.au/newspaper/article/68898860?searchTerm=%22oyster%20beds%22
Morning Bulletin (Rockhampton)	1924	South Keppel Island	Little Peninsula? Great Keppel Island	2	Not reported	2+	https://trove.nla.gov.au/newspaper/article/54107397?searchTerm=%22oyster%20beds%22
Daily Mercury (Mackay)	1927	Mount Pelion	Murray Creek	2	Not reported	Beds destroyed by heavy rain. 2+	https://trove.nla.gov.au/newspaper/article/169928296?searchTerm=%22oyster%20beds%22
Morning Bulletin (Rockhampton)	1936	A weekend on North Keppel	North Keppel Island	2	Not reported	2+	https://trove.nla.gov.au/newspaper/article/54973499?searchTerm=%22oyster%20beds%22
Morning Bulletin (Rockhampton)	1939	THOUGHTS FOR TODAY. ON QUARRELS	North Keppel Island	1	Not reported	Photograph of oyster bed, North Keppel Island	https://trove.nla.gov.au/newspaper/article/56018922?searchTerm=%22oyster%20beds%22
Morning Bulletin (Rockhampton)	1937	Yeppoon C.W.A Picnic at North Keppel	North Keppel Island	2	Not reported	2+	https://trove.nla.gov.au/newspaper/article/55006574?searchTerm=%22oyster%20beds%22
The Evening News (Rockhampton)	1937	and out of Town YEPPOON C.W.A. PICNIC AT NORTH KEPPEL.	North Keppel Island	2	Not reported	2+	https://trove.nla.gov.au/newspaper/article/199031640?searchTerm=%22oyster%20beds%22
Morning Bulletin (Rockhampton)	1936	POPULARITY OF WEEK-END PARTIES TO NORTH KEPPEL Numerous Attractions for Holiday-makers	North Keppel Island (Rocky Bay and North End)	4	Not reported	4+	https://trove.nla.gov.au/newspaper/article/54981349?searchTerm=%22oyster%20beds%22
The Evening News (Rockhampton)	1936	POPULARITY OF WEEK-END PARTIES TO NORTH KEPPEI. ROCKHAMPTON. October 27.	North Keppel Island (Rocky Bay and North End)	4	Not reported	4+	https://trove.nla.gov.au/newspaper/article/70569622?searchTerm=%22oyster%20beds%22
Morning Bulletin (Rockhampton)	1889	Our fish supply	North Rockhampton	2	Not reported	2+	https://trove.nla.gov.au/newspaper/article/52275681?searchTerm=%22oyster%20beds%22
Bowen Independent	1928	Accidents	Picnic Creek (near Merinda)	1	Not reported		https://trove.nla.gov.au/newspaper/article/194359141?searchTerm=%22oyster%20beds%22
Morning Bulletin (Rockhampton) + The Capricornian	1910	The fishing industry	Pumpkin Island	1	Not reported		https://trove.nla.gov.au/newspaper/article/53131748?searchTerm=%22oyster%20beds%22
The Capricornian	1910	The fishing industry	Pumpkin Island	1	Not reported		https://trove.nla.gov.au/newspaper/article/69126137?searchTerm=%22oyster%20beds%22
Daily Mercury (Mackay)	1925	A visit to Seaforth	Red cliff Islands	2	Not reported	2+	https://trove.nla.gov.au/newspaper/article/168621705?searchTerm=%22oyster%20beds%22
Daily Mercury (Mackay)	1930	BEAUTY SPOTS AROUND MACKAY. (Prize winning essay written by Mary Love, aged 14, of Mt. Jukes, in the 'Corner' competition)	Red cliff Islands	2	Not reported	2+	https://trove.nla.gov.au/newspaper/article/170449127?searchTerm=%22oyster%20beds%22
Daily Mercury (Mackay)	1933	Seaforth	Red cliff Islands	2	Not reported	Leases closed to allow for attraction and use of tourists. 2+	https://trove.nla.gov.au/newspaper/article/172742432?searchTerm=%22oyster%20beds%22
Daily Mercury (Mackay)	1934	Springcliff	Red cliff Islands	2	Not reported	Leases closed to allow for attraction and use of tourists. 2+	https://trove.nla.gov.au/newspaper/article/173318879?searchTerm=%22oyster%20beds%22
Morning Bulletin (Rockhampton)	1891	No title	Rockhampton	2	Not reported	2+	https://trove.nla.gov.au/newspaper/article/52345409?searchTerm=%22oyster%20beds%22
The Capricornian	1891	No title	Rockhampton	2	Not reported	2+	https://trove.nla.gov.au/newspaper/article/71924103?searchTerm=%22oyster%20beds%22
Morning Bulletin (Rockhampton) + The Capricornian	1910	The fishing industry	Rocky Islet (Cape Capricorn)	1	Not reported		https://trove.nla.gov.au/newspaper/article/53131748?searchTerm=%22oyster%20beds%22
The Capricornian	1910	The fishing industry	Rocky Islet (Cape Capricorn)	1	Not reported		https://trove.nla.gov.au/newspaper/article/69126137?searchTerm=%22oyster%20beds%22
Morning Bulletin (Rockhampton)	1911	GLADSTONE. (From Our Own Correspondent.)	Rodd's Harbour	1	Not reported		https://trove.nla.gov.au/newspaper/article/53204520?searchTerm=%22oyster%20beds%22
Morning Bulletin (Rockhampton)	1935	TWENTY-FIVE YEARS AGO From Our Back Files	Sea Hill?, Keppel Bay	1	19 acres/7.69ha		https://trove.nla.gov.au/newspaper/article/55533673?searchTerm=%22oyster%20beds%22
Morning Bulletin (Rockhampton)	1934	Oyster leases Port Curtis Harbour	Seal Rocks	1	Not reported	Strict enforcements - leases at locations not granted	https://trove.nla.gov.au/newspaper/article/55527519?searchTerm=%22oyster%20beds%22
Bowen Independent	1916	Longford Creek Notes	Sinclair Bay	2	Not reported	2+	https://trove.nla.gov.au/newspaper/article/196359668?searchTerm=%22oyster%20beds%22
Morning Bulletin (Rockhampton) + The Capricornian	1910	The fishing industry	South Keppel Island foreshore	1	Not reported		https://trove.nla.gov.au/newspaper/article/53131748?searchTerm=%22oyster%20beds%22
The Capricornian	1910	The fishing industry	South Keppel Island foreshore	1	Not reported		https://trove.nla.gov.au/newspaper/article/69126137?searchTerm=%22oyster%20beds%22
Morning Bulletin (Rockhampton)	1915	The minor waterways of central Queensland	The Narrows	2	Not reported	Beds smothered by railway construction. 2+	https://trove.nla.gov.au/newspaper/article/53356647?searchTerm=%22oyster%20beds%22
The Capricornian	1924	Two Illustrations. The Narrows	The Narrows	2	4-5ft above low water, carrying millions of oysters extended along the banks for hundreds of yards.	Smothered via dredge. 2+	https://trove.nla.gov.au/newspaper/article/69741027?searchTerm=%22oyster%20beds%22
Rockhampton Bulletin and Central QLD Advertiser	1870	The Rockhamption Balletin AND CENTRAL QUEENSLAND ADVERTISER	The Narrows to the Lightship to Keppel Bay	2		Old lyster shells in some place to 4 feet (1.22m)thick. 2+	https://trove.nla.gov.au/newspaper/article/51581073?searchTerm=%22oyster%20beds%22
The Rockhampton Bulletin and Central Queensland Advertiser	1870	The Rockhamption Bulletin AND CENTRAL QUEENSLAND ADVERTISER	The Narrows to the Lightship to Keppel Bay	2		Old lyster shells in some place to 4 feet (1.22m)thick. 2+	https://trove.nla.gov.au/newspaper/article/51581073?searchTerm=%22oyster%20beds%22
Bowen Independent	1919	Distinguished Visitors	Thomas Island	1	Not reported		https://trove.nla.gov.au/newspaper/article/192388931?searchTerm=%22oyster%20beds%22
Daily Mercury (Mackay)	1907	GENERAL NEWS. STEAMER FOR THURSDAY ISLAND.	Thursday Island	2	Not reported	"pearl shell AND oyster beds" 2+	https://trove.nla.gov.au/newspaper/article/176292644?searchTerm=%22oyster%20beds%22
Daily Mercury (Mackay)	1907	GENERAL NEWS. STEAMER FOR THURSDAY ISLAND.	Thursday Island	2	Not reported	2+	https://trove.nla.gov.au/newspaper/article/176292644?searchTerm=%22oyster%20beds%22
Daily Mercury (Mackay)	1906	TELEGRAMS THE PREMIER AT THURSDAY ISLAND. THURSDAY ISLAND, Tuesday.	Thursday Island	2	Not reported	Pearl oysters. Beds becoming overfished. 2+	https://trove.nla.gov.au/newspaper/article/171570771?searchTerm=%22oyster%20beds%22
Morning Bulletin (Rockhampton)	1907	DEPUTATIONS TO MINISTERS MR. KIDSTON PROMISES AID TO THE PEAELING INDUSTRY. [By Telegraph.]	Thursday Island	2	Not reported	Beds becoming overfished. 2+	https://trove.nla.gov.au/newspaper/article/53089627?searchTerm=%22oyster%20beds%22
Morning Bulletin (Rockhampton)	1907	QUEENSLAND NEWS. [By Telegraph.] BRISBANE	Thursday Island	2	Not reported	"pearl shell AND oyster beds" 2+	https://trove.nla.gov.au/newspaper/article/53091383?searchTerm=%22oyster%20beds%22
Morning Bulletin (Rockhampton)	1907	QUEENSLAND NEWS. [By Telegraph.] BRISBANE	Thursday Island	2	Not reported	2+	https://trove.nla.gov.au/newspaper/article/53091383?searchTerm=%22oyster%20beds%22
The Capricornian	1907	QUEENSLAND NEWS. [By Telegraph.] BRISBANE	Thursday Island	2	Not reported	"pearl shell AND oyster beds" 2+	https://trove.nla.gov.au/newspaper/article/71896129?searchTerm=%22oyster%20beds%22
The Capricornian	1907	QUEENSLAND NEWS. [By Telegraph.] BRISBANE	Thursday Island	2	Not reported	2+	https://trove.nla.gov.au/newspaper/article/71896129?searchTerm=%22oyster%20beds%22
Daily Mercury (Mackay)	1934	Accidents	Town Beach	1	Not reported		https://www.google.com/maps/place/Red+Beach/@-23.1846808,150.9835724,1054m/data=!3m2!1e3!4b1!4m5!3m4!1s0x6bc29591d7224b4f:0xbefee6ae2e7edb12!8m2!3d-23.1846857!4d150.9857611
The North Queensland Register (Townsville)	1901	No title	White Cliffs	1	Not reported		https://trove.nla.gov.au/newspaper/article/85560777?searchTerm=%22oyster%20beds%22
The North Queensland Register (Townsville)	1901	Wedding party at the Herrod - Moody Wedding	White Cliffs	2	Not reported	2+	https://trove.nla.gov.au/newspaper/article/85563302?searchTerm=%22oyster%20beds%22
Morning Bulletin (Rockhampton)	1929	The cruise of the "Busy Bee"	Zilzie	2	Not reported	2+	https://www.google.com/maps/search/Gatcombe+head/@-23.6014563,150.5076455,259446m/data=!3m1!1e3
Townsville Daily Bulletin	1931	Ideal fishing grounds	Zoe Bay	1	Not reported		https://trove.nla.gov.au/newspaper/article/61330674?searchTerm=%22oyster%20beds%22
Daily Mercury (Mackay)	1931	Visit to Whitsunday	Cid Harbour	1	NA	This is the only site that was referred to as an oyster reef	https://trove.nla.gov.au/newspaper/article/170423405?searchTerm=%22oyster%20reefs%22

## Sheet: Trop QLD oyster reef co-ords
Year	Region	Location	Latitude	Longitude	Max no. of reported beds	Notes	Total reefs
1911	Seventeen Seventy to Yeppoon	Rodd's Harbour	-24.0342	151.619	1
1909	Seventeen Seventy to Yeppoon	Bustard Head	-24.0222	151.765	3
1911	Seventeen Seventy to Yeppoon	Boyne River	-23.978	151.322	1
1934	Seventeen Seventy to Yeppoon	Ethel Rocks	-23.9721	151.624	1	Strict enforcements - leases at locations not granted
1934	Seventeen Seventy to Yeppoon	Seal Rocks	-23.9555	151.488	1	Strict enforcements - leases at locations not granted
1911	Seventeen Seventy to Yeppoon	Boyne Island	-23.9356	151.338	1
1911	Seventeen Seventy to Yeppoon	Gatcombe Head (Southern point of Facing Island)	-23.88	151.377	1
1934	Seventeen Seventy to Yeppoon	Curtis Island (S end)	-23.7726	151.257	1	Strict enforcements - leases at locations not granted
1934	Seventeen Seventy to Yeppoon	Facing Island (N end)	-23.7698	151.33	1	Strict enforcements - leases at locations not granted
1934	Seventeen Seventy to Yeppoon	Facing Island (Clump Point - North Point?)	-23.7535	151.335	1	Strict enforcements - leases at locations not granted
1924	Seventeen Seventy to Yeppoon	The Narrows	-23.6391	151.073	2	Smothered via dredge. 2+
1935	Seventeen Seventy to Yeppoon	Connors Creek to E Balaclava Island	-23.5828	150.965	3
1870	Seventeen Seventy to Yeppoon	Cassarina Creek (Casuarina Creek?)	-23.5755	150.797	2	Old lyster shells in some place to 4 feet (1.22m)thick. 2+
1870	Seventeen Seventy to Yeppoon	The Narrows to the Lightship to Keppel Bay	-23.5575	151.012	2	Old lyster shells in some place to 4 feet (1.22m)thick. 2+
1935	seventeen Seventy to Yeppoon	Sea Hill?, Keppel Bay	-23.4885	150.961	1
1910	Seventeen Seventy to Yeppoon	Rocky Islet (Cape Capricorn)	-23.4859	151.235	1
1902	Seventeen Seventy to Yeppoon	Keppel Bay	-23.4041	150.877	2	Beds becoming depleted. 2+
1926	Seventeen Seventy to Yeppoon	Hummocky Island	-23.4019	151.153	2	2+
1889	Seventeen Seventy to Yeppoon	North Rockhampton	-23.3765	150.55	2	2+
1891	Seventeen Seventy to Yeppoon	Rockhampton	-23.371	150.511	2	2+
1929	Seventeen Seventy to Yeppoon	Coorooman Creek (near emu park)	-23.3003	150.77	2	"Maintenance of yster beds in close proximity to a resort would call for armed guards". 2+
1929	Seventeen Seventy to Yeppoon	Zilzie	-23.2808	150.824	2	2+
1910	Seventeen Seventy to Yeppoon	Halfway Island	-23.1987	150.972	1
1924	Seventeen Seventy to Yeppoon	South Keppel Island - Little Peninsula?	-23.1816	150.982	2	2+
1910	Seventeen Seventy to Yeppoon	Pumpkin Island	-23.0921	150.901	1
1936	Seventeen Seventy to Yeppoon	North Keppel Island (Rocky Bay )	-23.0804	150.9	2	2+
	Seventeen Seventy to Yeppoon	North Keppel Island (North End)	-23.0542	150.894	2
1910	Seventeen Seventy to Yeppoon	Corroboree Island	-23.0489	150.886	1
1910	Seventeen Seventy to Yeppoon	Conical Island	-23.0469	150.88	1		45
1926	Carmila to Townsville	Carmilla	-21.8044	149.382	1	"7ft syrup tin full of oysters in a vert short time"
1939	Carmila to Townsville	Far Beach	-21.179	149.195	2	2+
1934	Carmila to Townsville	Town Beach	-21.156	149.203	1
1927	Carmila to Townsville	Murray Creek	-20.8771	148.84	2	Beds destroyed by heavy rain. 2+
1934	Carmila to Townsville	Red cliff Islands	-20.8695	148.961	2	Leases closed to allow for attraction and use of tourists. 2+
1931	Carmila to Townsville	Cid Harbour	-20.2505	148.933	1
1916	Carmila to Townsville	Sinclair Bay	-20.1136	148.453	2	2+
1933	Carmila to Townsville	Bowen	-20.0981	148.291	2	"if a dozen or so are smashed up for every one swallowed, "well there are plenty more"".2+
1919	Carmila to Townsville	Thomas Island	-20.0816	148.297	1
1912	Carmila to Townsville	Greta Creek, Port Denison?	-20.0312	148.251	1
1919	Carmila to Townsville	Hardup Island? Near Bowen	-20.0202	148.274	2	2+
1928	Carmila to Townsville	Picninc Crek (near Merinda)	-20.0098	148.204	1
1904	Carmila to Townsville	Cape Upstart	-19.7407	147.801	1
1925	Carmila to Townsville	Burdekin River	-19.6657	147.53	2	2+
1905	Carmila to Townsville	Alligator Creek	-19.3598	146.974	1		22
1939	Townsville to Port Douglas	Havannah Island	-18.8398	146.541	2	2+
1931	Townsville to Port Douglas	Zoe Bay	-18.4014	146.327	1
1931	Townsville to Port Douglas	Hillock Point (S) to Cape Richards (N) (Eastern side of island)	-18.2323	146.298	2	10 bags filled in very little time. 2+
1925	Townsville to Port Douglas	Cardwell (inlet)	-18.2315	146.017	2	2+
1930	Townsville to Port Douglas	Cape Richards	-18.197	146.223	2	2+
1933	Townsville to Port Douglas	Garden Island	-18.1843	146.145	2	2+
1925	Townsville to Port Douglas	Gould (Goold?) Island	-18.166	146.171	1	"Filled 5 sacks in an hour". Caution against overexploitation
1935	Townsville to Port Douglas	4miles from Tam O'Shanter Point	-17.9817	146.136	2	2+
1926	Townsville to Port Douglas	Clump Point (boatramp)	-17.8532	146.117	2	2+
1936	Townsville to Port Douglas	Bingil Bay	-17.8314	146.1	2	2+
1941	Townsville to Port Douglas	Flying Fish Point	-17.5043	146.076	1
1901	Townsville to Port Douglas	Cairns	-16.8989	145.765	1
1888	Townsville to Port Douglas	Double Island (Ellis Beach)	-16.7259	145.683	1
1901	Townsville to Port Douglas	White Cliffs	-16.5845	145.517	2	2+	23
1906	Northern tip of Queensland	Thursday Island	-10.5795	142.222	4	Pearl oysters. Beds becoming overfished. 4+
					94
